# Supplementary material for: ISR8/IRF1-AS1 Is Relevant for IFNα and NF-κB Responses
Source: Front Immunol. 2022 Jul 4;13:829335. doi: 10.3389/fimmu.2022.829335 (PMC9289242; doi:10.3389/fimmu.2022.829335)
Supplement: Supplementary Table 3 — List of coding genes deregulated in pNISR8 compared to HeLa cells. [file Table_3.xlsx]

## Sheet: DifferentCodingExpressed
gene_id	gene_name	Hela_Ctrl	Hela_IFN6h	pNISR8_Ctrl	pNISR8_IFN6h
ENSG00000175899.14	A2M	7808	8216	286	281
ENSG00000128274.15	A4GALT	3186	3779	363	392
ENSG00000205002.3	AARD	0	0	460	518
ENSG00000181409.11	AATK	74	30	1283	1399
ENSG00000183044.11	ABAT	15	10	1209	1193
ENSG00000277758.4	ABC7-42404400C24.1	13	18	154	180
ENSG00000005471.15	ABCB4	17	11	151	105
ENSG00000069431.11	ABCC9	0	0	150	141
ENSG00000101986.11	ABCD1	8495	13701	1942	2168
ENSG00000160179.18	ABCG1	2232	2106	217	188
ENSG00000172350.9	ABCG4	10	4	322	315
ENSG00000143994.13	ABHD1	29	30	234	274
ENSG00000108798.8	ABI3	2	9	104	119
ENSG00000258881.6	AC007040.11	2	0	213	200
ENSG00000196177.12	ACADSB	987	805	5120	5298
ENSG00000157766.15	ACAN	2	0	381	279
ENSG00000176244.6	ACBD7	25	32	334	404
ENSG00000159640.15	ACE	4	6	1116	1034
ENSG00000087085.13	ACHE	8	10	300	297
ENSG00000144476.5	ACKR3	13717	14844	138	174
ENSG00000168306.12	ACOX2	0	4	622	555
ENSG00000103740.9	ACSBG1	53	24	190	243
ENSG00000167107.12	ACSF2	436	514	2506	2438
ENSG00000005187.11	ACSM3	4	10	436	454
ENSG00000154930.14	ACSS1	58	104	3408	3369
ENSG00000111058.7	ACSS3	6	1	1439	1416
ENSG00000169067.3	ACTBL2	6	26	270	334
ENSG00000159251.6	ACTC1	3407	2662	191	162
ENSG00000077522.12	ACTN2	6	8	1603	1557
ENSG00000123612.15	ACVR1C	6	6	717	674
ENSG00000114739.13	ACVR2B	1270	1159	9761	8748
ENSG00000139567.12	ACVRL1	2	2	908	1019
ENSG00000196839.12	ADA	476	439	2311	2298
ENSG00000073670.13	ADAM11	284	271	3724	3781
ENSG00000151651.15	ADAM8	55	65	385	328
ENSG00000142303.13	ADAMTS10	3246	2417	521	483
ENSG00000160323.18	ADAMTS13	205	174	3735	3851
ENSG00000138316.10	ADAMTS14	4	13	119	126
ENSG00000140470.13	ADAMTS17	0	0	1510	1456
ENSG00000145808.8	ADAMTS19	1	0	274	294
ENSG00000087116.14	ADAMTS2	8	12	2717	2580
ENSG00000173157.16	ADAMTS20	2	11	979	980
ENSG00000049192.14	ADAMTS6	4667	5793	162	165
ENSG00000163638.13	ADAMTS9	4	4	611	565
ENSG00000197859.9	ADAMTSL2	50	38	283	264
ENSG00000197381.15	ADARB1	16049	22490	3504	3582
ENSG00000164742.14	ADCY1	47	22	4032	3807
ENSG00000173175.14	ADCY5	41	23	210	184
ENSG00000141433.12	ADCYAP1	0	0	189	146
ENSG00000078549.14	ADCYAP1R1	2	2	983	888
ENSG00000075340.22	ADD2	16	12	6405	6380
ENSG00000181790.10	ADGRB1	2	14	402	500
ENSG00000111452.12	ADGRD1	2842	2773	129	91
ENSG00000205336.11	ADGRG1	48803	35203	254	226
ENSG00000072071.16	ADGRL1	1732	1495	12644	12193
ENSG00000150471.16	ADGRL3	30	42	548	601
ENSG00000164199.15	ADGRV1	63	48	4403	4119
ENSG00000274286.1	ADRA2B	0	8	151	181
ENSG00000184160.7	ADRA2C	84	59	1157	1132
ENSG00000043591.5	ADRB1	12	4	718	697
ENSG00000185100.10	ADSSL1	1979	1805	248	276
ENSG00000241489.7	AF011889.5	19	11	123	110
ENSG00000169129.14	AFAP1L2	54	22	1102	888
ENSG00000155966.13	AFF2	2	2	1254	1345
ENSG00000144218.18	AFF3	243	105	1169	1261
ENSG00000135439.11	AGAP2	10	15	264	258
ENSG00000204172.12	AGAP9	188	149	4515	4319
ENSG00000185567.6	AHNAK2	25273	22674	550	654
ENSG00000126878.12	AIF1L	1899	1482	12418	12544
ENSG00000176092.13	AIM1L	21	18	399	378
ENSG00000165695.9	AK8	8	4	130	112
ENSG00000111254.7	AKAP3	8	36	205	143
ENSG00000187134.13	AKR1C1	1685	1416	317	245
ENSG00000151632.17	AKR1C2	31862	27561	265	245
ENSG00000196139.13	AKR1C3	22927	20574	159	135
ENSG00000117020.16	AKT3	59	192	7870	7475
ENSG00000279508.1	AL589743.1	103	168	1002	1108
ENSG00000165092.12	ALDH1A1	50	38	244	226
ENSG00000144908.13	ALDH1L1	14	10	137	166
ENSG00000108602.17	ALDH3A1	13802	12534	203	255
ENSG00000006534.15	ALDH3B1	13940	12873	483	551
ENSG00000118514.13	ALDH8A1	8	15	145	153
ENSG00000189366.9	ALG1L	19	47	435	443
ENSG00000179477.9	ALOX12B	0	13	124	138
ENSG00000012779.10	ALOX5	15	30	809	774
ENSG00000136383.6	ALPK3	58	59	3925	3785
ENSG00000163283.6	ALPP	227	191	967	1148
ENSG00000163286.8	ALPPL2	6	4	4739	4375
ENSG00000052850.5	ALX4	24	8	5396	5286
ENSG00000135409.10	AMHR2	0	2	236	211
ENSG00000126016.14	AMOT	396	432	3395	3165
ENSG00000078053.16	AMPH	2	6	449	533
ENSG00000154188.9	ANGPT1	548	504	112	90
ENSG00000136859.9	ANGPTL2	54	36	644	618
ENSG00000029534.19	ANK1	105	72	580	621
ENSG00000145362.17	ANK2	21	30	1876	1749
ENSG00000160117.14	ANKLE1	2011	1637	149	154
ENSG00000148677.6	ANKRD1	101	57	12612	13626
ENSG00000145700.9	ANKRD31	10	4	210	209
ENSG00000164236.11	ANKRD33B	1415	2438	18626	18003
ENSG00000189127.7	ANKRD34B	10	4	431	356
ENSG00000135299.16	ANKRD6	13	14	1763	1689
ENSG00000230778.1	ANKRD63	13	2	153	133
ENSG00000235098.8	ANKRD65	4	4	188	179
ENSG00000131620.17	ANO1	2	0	129	90
ENSG00000047617.14	ANO2	36	36	267	206
ENSG00000171714.10	ANO5	2	2	3367	3195
ENSG00000185101.12	ANO9	226	224	1515	1501
ENSG00000169604.19	ANTXR1	35543	32042	3802	3763
ENSG00000138772.12	ANXA3	14248	13863	1081	1179
ENSG00000265190.6	ANXA8	1868	1814	242	310
ENSG00000131480.8	AOC2	75	53	460	478
ENSG00000131471.6	AOC3	49	35	449	426
ENSG00000103723.12	AP3B2	15	15	262	214
ENSG00000107282.7	APBA1	17	14	483	507
ENSG00000034053.14	APBA2	8	8	3702	3750
ENSG00000154856.12	APCDD1	33	38	427	474
ENSG00000244509.3	APOBEC3C	176	154	3891	3681
ENSG00000243811.7	APOBEC3D	3	3	341	342
ENSG00000128394.16	APOBEC3F	3	102	622	578
ENSG00000239713.7	APOBEC3G	6	42	404	408
ENSG00000130208.9	APOC1	61	74	696	688
ENSG00000189058.8	APOD	2	0	212	160
ENSG00000130203.9	APOE	54	18	1098	1047
ENSG00000128335.13	APOL2	4263	38247	2211	3585
ENSG00000240583.10	AQP1	2150	1486	105	118
ENSG00000165272.14	AQP3	28583	31289	746	670
ENSG00000198576.3	ARC	38	10	784	751
ENSG00000275832.4	ARHGAP23	16043	14739	2971	3143
ENSG00000163219.11	ARHGAP25	6	8	246	283
ENSG00000186517.13	ARHGAP30	36	33	474	506
ENSG00000124143.10	ARHGAP40	2	2	131	151
ENSG00000241484.9	ARHGAP8	0	2	270	341
ENSG00000242173.8	ARHGDIG	4	4	2175	2299
ENSG00000240771.6	ARHGEF25	619	503	3960	3831
ENSG00000129675.15	ARHGEF6	12	14	1180	1243
ENSG00000116017.10	ARID3A	765	639	5481	6133
ENSG00000179361.17	ARID3B	618	580	7116	7107
ENSG00000152213.3	ARL11	0	0	348	323
ENSG00000188042.7	ARL4C	268	196	8218	8405
ENSG00000184867.13	ARMCX2	24367	17938	3111	3065
ENSG00000172379.19	ARNT2	2	6	1717	1929
ENSG00000113369.8	ARRDC3	10790	12342	991	1153
ENSG00000140450.8	ARRDC4	333	174	1926	1789
ENSG00000006756.15	ARSD	4	0	310	357
ENSG00000157399.14	ARSE	0	0	284	304
ENSG00000167311.13	ART5	4	14	1289	1263
ENSG00000004848.7	ARX	0	2	216	182
ENSG00000141505.11	ASGR1	22	14	287	303
ENSG00000198363.16	ASPH	31046	26964	4790	4145
ENSG00000174939.10	ASPHD1	3107	2667	111	115
ENSG00000128203.6	ASPHD2	49	92	959	928
ENSG00000148219.16	ASTN2	238	177	1237	1154
ENSG00000141431.10	ASXL3	0	0	176	152
ENSG00000162772.16	ATF3	726	1423	8216	8724
ENSG00000166669.13	ATF7IP2	335	218	1811	1846
ENSG00000181652.18	ATG9B	2	10	187	176
ENSG00000168874.12	ATOH8	4054	3467	662	703
ENSG00000075673.11	ATP12A	0	0	208	220
ENSG00000105409.16	ATP1A3	6	36	433	464
ENSG00000143153.12	ATP1B1	25417	20979	4021	3766
ENSG00000129244.8	ATP1B2	34	24	847	816
ENSG00000116039.11	ATP6V1B1	26	41	215	258
ENSG00000123191.14	ATP7B	313	277	4368	4252
ENSG00000124406.16	ATP8A1	533	440	2681	2749
ENSG00000132932.16	ATP8A2	2	0	300	298
ENSG00000130270.16	ATP8B3	1523	1294	219	211
ENSG00000107518.16	ATRNL1	4	0	824	744
ENSG00000119986.6	AVPI1	8261	8781	1396	1371
ENSG00000166148.3	AVPR1A	2	2	188	184
ENSG00000167601.11	AXL	21740	23278	406	412
ENSG00000166710.17	B2M	152938	208837	15158	16179
ENSG00000172318.5	B3GALT1	56	21	281	221
ENSG00000183778.17	B3GALT5	16	18	743	747
ENSG00000112309.10	B3GAT2	22	16	339	353
ENSG00000176383.8	B3GNT4	34	35	253	239
ENSG00000177191.2	B3GNT8	8	4	163	145
ENSG00000139044.10	B4GALNT3	33	24	8997	9294
ENSG00000086062.12	B4GALT1	112099	117664	8340	7955
ENSG00000164929.16	BAALC	6	7	89	125
ENSG00000112182.14	BACH2	125	249	1656	1727
ENSG00000107262.17	BAG1	30310	34472	4156	3970
ENSG00000266074.8	BAHCC1	937	947	8456	8352
ENSG00000128298.16	BAIAP2L2	14	21	594	632
ENSG00000007516.13	BAIAP3	131	59	535	489
ENSG00000143032.7	BARHL2	0	0	222	199
ENSG00000131668.13	BARX1	159	192	2087	2140
ENSG00000043039.6	BARX2	0	4	853	846
ENSG00000176788.8	BASP1	127261	122390	13654	13653
ENSG00000168062.9	BATF2	8	4085	96	210
ENSG00000163093.11	BBS5	138	107	707	622
ENSG00000137936.16	BCAR3	2433	3242	467	408
ENSG00000114200.9	BCHE	24	10	130	100
ENSG00000119866.20	BCL11A	2	6	1718	1667
ENSG00000127152.17	BCL11B	12	0	221	156
ENSG00000069399.13	BCL3	5843	5414	342	319
ENSG00000110987.8	BCL7A	339	239	5445	5290
ENSG00000166546.13	BEAN1	4	0	200	200
ENSG00000183092.16	BEGAIN	11507	11189	284	274
ENSG00000188848.15	BEND4	2	3	3226	3138
ENSG00000151917.17	BEND6	959	899	163	113
ENSG00000165626.16	BEND7	0	2	1717	1601
ENSG00000133134.11	BEX2	53	66	1301	1359
ENSG00000102409.9	BEX4	6	6	4105	3975
ENSG00000182492.15	BGN	2765	2432	371	402
ENSG00000123095.5	BHLHE41	50	33	1494	1255
ENSG00000162069.14	BICDL2	2	0	283	334
ENSG00000100290.2	BIK	18	7	153	127
ENSG00000136717.14	BIN1	10501	11010	1872	1836
ENSG00000168487.17	BMP1	16430	16265	3174	3031
ENSG00000125378.15	BMP4	117	192	1346	1293
ENSG00000112175.7	BMP5	0	0	636	598
ENSG00000101144.12	BMP7	4	2	7702	7693
ENSG00000164619.8	BMPER	1532	1344	158	123
ENSG00000176720.4	BOK	1587	1434	118	130
ENSG00000174672.15	BRSK2	78	49	916	984
ENSG00000164061.4	BSN	160	153	1526	1540
ENSG00000119411.10	BSPRY	0	0	230	248
ENSG00000151136.14	BTBD11	2	2	2243	2156
ENSG00000132640.14	BTBD3	32972	28575	5758	5632
ENSG00000026950.16	BTN3A1	2277	8759	962	1103
ENSG00000186470.13	BTN3A2	5235	10874	1488	1694
ENSG00000111801.15	BTN3A3	2768	7047	467	476
ENSG00000165810.16	BTNL9	13	4	697	716
ENSG00000165507.8	C10orf10	124	78	63916	62243
ENSG00000165863.16	C10orf82	0	0	366	365
ENSG00000166323.12	C11orf65	12	23	135	103
ENSG00000187479.5	C11orf96	20	27	242	197
ENSG00000139971.15	C14orf37	40	52	1185	1039
ENSG00000188549.12	C15orf52	8705	6613	1115	1203
ENSG00000205363.5	C15orf59	6	2	1305	1291
ENSG00000166780.10	C16orf45	2125	3281	284	336
ENSG00000205832.7	C16orf96	2	0	110	93
ENSG00000221916.3	C19orf73	28	17	133	106
ENSG00000235034.6	C19orf81	0	0	384	368
ENSG00000163362.10	C1orf106	182	143	1013	969
ENSG00000118292.8	C1orf54	26	53	227	233
ENSG00000186897.4	C1QL4	78	40	878	881
ENSG00000173918.14	C1QTNF1	2873	2834	290	265
ENSG00000159403.15	C1R	5196	13407	1292	1265
ENSG00000182326.14	C1S	7070	14187	977	999
ENSG00000171984.14	C20orf196	74	57	465	465
ENSG00000101220.17	C20orf27	3041	2629	14927	14861
ENSG00000196476.11	C20orf96	12	4	1619	1523
ENSG00000183186.7	C2CD4C	8	2	639	635
ENSG00000204128.5	C2orf72	18	5	738	721
ENSG00000159239.12	C2orf81	76	29	287	263
ENSG00000125730.16	C3	34592	47212	304	199
ENSG00000114405.10	C3orf14	0	0	900	877
ENSG00000187068.2	C3orf70	24	4	532	575
ENSG00000106804.7	C5	549	571	119	82
ENSG00000197536.10	C5orf56	309	3235	119	189
ENSG00000153790.11	C7orf31	128	130	933	821
ENSG00000176907.4	C8orf4	14608	17908	298	322
ENSG00000183784.6	C9orf66	0	0	162	119
ENSG00000178538.9	CA8	4	2	3406	3260
ENSG00000160325.14	CACFD1	731	567	3364	3288
ENSG00000148408.12	CACNA1B	4	0	1841	1797
ENSG00000151067.21	CACNA1C	57	74	526	456
ENSG00000157388.14	CACNA1D	0	2	258	250
ENSG00000196557.11	CACNA1H	14	14	12212	11921
ENSG00000007402.11	CACNA2D2	37	32	345	342
ENSG00000157445.14	CACNA2D3	4973	4019	886	894
ENSG00000130433.7	CACNG6	0	12	184	173
ENSG00000142408.3	CACNG8	26	206	1440	1319
ENSG00000182985.16	CADM1	1514	1260	15132	13751
ENSG00000175868.13	CALCB	2	6	257	255
ENSG00000138172.10	CALHM2	236	229	1586	1586
ENSG00000130643.8	CALY	5	2	185	221
ENSG00000183049.12	CAMK1D	7351	6563	672	650
ENSG00000058404.19	CAMK2B	12	8	243	228
ENSG00000162545.5	CAMK2N1	124	162	1029	1001
ENSG00000164076.16	CAMKV	28	2	153	144
ENSG00000076826.9	CAMSAP3	54	64	2917	2773
ENSG00000042493.15	CAPG	9126	10135	717	751
ENSG00000149260.15	CAPN5	127	63	1911	1899
ENSG00000198286.9	CARD11	322	455	3138	3217
ENSG00000132357.13	CARD6	4135	5074	408	427
ENSG00000187796.13	CARD9	168	135	1395	1517
ENSG00000159753.13	CARMIL2	227	166	1832	2012
ENSG00000167971.15	CASKIN1	148	105	1823	1656
ENSG00000099338.22	CATSPERG	10	19	204	182
ENSG00000129993.14	CBFA2T3	2	0	308	337
ENSG00000274276.4	CBSL	126	108	668	759
ENSG00000188649.12	CC2D2B	25	21	131	122
ENSG00000183287.13	CCBE1	2	4	621	532
ENSG00000168491.9	CCDC110	14	16	129	110
ENSG00000105479.15	CCDC114	14	8	162	139
ENSG00000161180.10	CCDC116	10	11	213	151
ENSG00000151773.12	CCDC122	119	93	565	613
ENSG00000128596.16	CCDC136	218	182	1544	1466
ENSG00000248712.7	CCDC153	23	26	124	145
ENSG00000117477.12	CCDC181	11	38	854	960
ENSG00000177875.4	CCDC184	4	14	492	510
ENSG00000260220.5	CCDC187	7	16	342	354
ENSG00000151468.10	CCDC3	374	331	2388	2489
ENSG00000130783.13	CCDC62	18	12	117	94
ENSG00000198624.12	CCDC69	247	233	1999	1872
ENSG00000169515.5	CCDC8	6	12	7212	7473
ENSG00000091986.15	CCDC80	19680	22529	3585	3563
ENSG00000182791.4	CCDC87	32	39	234	245
ENSG00000179071.4	CCDC89	0	0	169	141
ENSG00000110148.9	CCKBR	0	0	248	244
ENSG00000108691.9	CCL2	6863	23382	124	114
ENSG00000133101.9	CCNA1	58	68	337	329
ENSG00000118971.7	CCND2	13	8	7559	7049
ENSG00000177455.12	CD19	0	0	207	247
ENSG00000158473.6	CD1D	4	6	225	207
ENSG00000116031.8	CD207	0	3	148	157
ENSG00000272398.5	CD24	23627	18969	525	563
ENSG00000174059.16	CD34	4	14	191	149
ENSG00000101017.13	CD40	0	0	973	935
ENSG00000026508.16	CD44	44613	48710	4094	3875
ENSG00000196352.14	CD55	51042	50835	4575	4189
ENSG00000085063.14	CD59	96392	96686	14587	14139
ENSG00000013725.14	CD6	2	12	319	327
ENSG00000125726.10	CD70	1993	1855	262	253
ENSG00000019582.14	CD74	1840	2981	225	230
ENSG00000112149.9	CD83	12659	9775	1758	1464
ENSG00000153563.15	CD8A	2	6	303	269
ENSG00000158825.5	CDA	4457	3686	498	506
ENSG00000081377.16	CDC14B	964	814	6936	6709
ENSG00000167617.2	CDC42EP5	4	4	113	106
ENSG00000163814.7	CDCP1	6998	7836	158	125
ENSG00000140945.16	CDH13	6138	5937	1075	1016
ENSG00000107736.19	CDH23	6	2	551	516
ENSG00000124215.16	CDH26	0	0	185	176
ENSG00000062038.13	CDH3	40	149	1893	1731
ENSG00000179242.15	CDH4	49	47	548	570
ENSG00000150394.13	CDH8	62	31	398	366
ENSG00000148600.14	CDHR1	4	4	208	225
ENSG00000176749.8	CDK5R1	314	226	1833	1590
ENSG00000138769.10	CDKL2	13	21	603	621
ENSG00000008086.11	CDKL5	2204	3004	451	444
ENSG00000129596.4	CDO1	4	2	488	528
ENSG00000165556.9	CDX2	34	18	3321	3142
ENSG00000245848.2	CEBPA	13	5	961	986
ENSG00000172216.5	CEBPB	8348	7755	1487	1289
ENSG00000221869.4	CEBPD	3114	3753	240	301
ENSG00000099954.18	CECR2	12	2	5467	5501
ENSG00000183307.3	CECR6	6	16	228	222
ENSG00000170835.13	CEL	19	12	1582	1526
ENSG00000008300.15	CELSR3	12142	12146	735	768
ENSG00000223802.7	CERS1	63	27	795	858
ENSG00000090661.11	CERS4	11	4	1997	1940
ENSG00000172828.12	CES3	50	76	1920	1969
ENSG00000163075.12	CFAP221	0	6	124	201
ENSG00000197748.12	CFAP43	10	9	163	121
ENSG00000171811.12	CFAP46	2	0	195	171
ENSG00000156042.17	CFAP70	42	46	354	347
ENSG00000142609.17	CFAP74	0	4	106	96
ENSG00000116785.13	CFHR3	10	15	92	118
ENSG00000143375.14	CGN	311	150	5254	4977
ENSG00000128849.10	CGNL1	296	294	3996	3855
ENSG00000138028.14	CGREF1	3742	3565	549	463
ENSG00000275993.2	CH507-42P11.8	5724	6039	110	121
ENSG00000116254.17	CHD5	24	32	178	217
ENSG00000090539.15	CHRD	104	145	1059	1092
ENSG00000101938.14	CHRDL1	200	253	3634	3560
ENSG00000166664.13	CHRFAM7A	10	15	274	257
ENSG00000133019.11	CHRM3	76	40	2102	1953
ENSG00000080644.15	CHRNA3	69	55	445	395
ENSG00000175344.17	CHRNA7	12	14	502	499
ENSG00000117971.11	CHRNB4	6	2	529	514
ENSG00000175040.5	CHST2	142	126	984	996
ENSG00000140835.9	CHST4	0	0	138	121
ENSG00000154080.13	CHST9	0	2	227	258
ENSG00000198108.3	CHSY3	3144	4419	512	526
ENSG00000136425.12	CIB2	204	146	2683	2719
ENSG00000179583.18	CIITA	611	3129	188	199
ENSG00000160161.9	CILP2	10	12	1714	1701
ENSG00000125931.10	CITED1	23	19	1651	1746
ENSG00000164442.9	CITED2	2516	2144	17566	17733
ENSG00000104879.4	CKM	0	0	129	135
ENSG00000223572.9	CKMT1A	15	9	846	816
ENSG00000237289.9	CKMT1B	50	30	1092	1048
ENSG00000175505.10	CLCF1	2232	1869	202	183
ENSG00000186510.11	CLCNKA	30	32	187	178
ENSG00000184908.17	CLCNKB	85	53	389	389
ENSG00000163347.5	CLDN1	4801	4898	554	490
ENSG00000164007.10	CLDN19	0	2	351	376
ENSG00000105472.12	CLEC11A	2	2	1186	1212
ENSG00000150048.10	CLEC1A	0	0	371	353
ENSG00000152672.7	CLEC4F	0	0	265	292
ENSG00000112782.15	CLIC5	4	9	395	404
ENSG00000158258.16	CLSTN2	5	6	166	178
ENSG00000120885.20	CLU	294450	270217	25289	24154
ENSG00000079101.16	CLUL1	1	0	148	83
ENSG00000153551.13	CMTM7	127	68	2817	2654
ENSG00000143786.7	CNIH3	70	82	535	427
ENSG00000149970.14	CNKSR2	0	0	514	418
ENSG00000153721.18	CNKSR3	620	577	4014	4176
ENSG00000119946.10	CNNM1	2375	1605	160	166
ENSG00000122756.14	CNTFR	2	0	117	124
ENSG00000108797.11	CNTNAP1	10341	10368	1744	1769
ENSG00000174469.18	CNTNAP2	5	2	3597	3450
ENSG00000154529.14	CNTNAP3B	658	613	122	98
ENSG00000106078.17	COBL	17052	17688	2838	2891
ENSG00000111799.20	COL12A1	63094	63556	2867	2909
ENSG00000197467.13	COL13A1	8	4	599	622
ENSG00000084636.17	COL16A1	2282	1697	276	280
ENSG00000065618.17	COL17A1	3	6	247	254
ENSG00000182871.14	COL18A1	1385	1144	10594	11013
ENSG00000082293.12	COL19A1	0	0	136	149
ENSG00000124749.16	COL21A1	4	6	243	253
ENSG00000050767.15	COL23A1	0	0	472	527
ENSG00000171502.14	COL24A1	77	129	757	760
ENSG00000188517.14	COL25A1	10070	10819	1620	1574
ENSG00000160963.13	COL26A1	14	29	1091	1081
ENSG00000196739.14	COL27A1	6485	6829	1213	1327
ENSG00000168542.13	COL3A1	128933	117015	1327	1392
ENSG00000134871.17	COL4A2	81740	75401	12538	12379
ENSG00000081052.11	COL4A4	15283	16671	308	299
ENSG00000188153.12	COL4A5	21085	20963	2833	2874
ENSG00000130635.15	COL5A1	176875	174166	20723	20823
ENSG00000204262.11	COL5A2	332	343	3444	3180
ENSG00000142156.14	COL6A1	802	811	13122	13063
ENSG00000142173.14	COL6A2	98	113	5844	5934
ENSG00000114270.16	COL7A1	153235	131966	880	1005
ENSG00000112280.15	COL9A1	0	1	125	130
ENSG00000049089.13	COL9A2	118	86	1024	1007
ENSG00000118004.17	COLEC11	4	0	244	271
ENSG00000158270.11	COLEC12	8	4	3958	3729
ENSG00000198756.10	COLGALT2	312	184	1616	1644
ENSG00000206561.12	COLQ	30	16	147	96
ENSG00000105664.10	COMP	6	2	160	160
ENSG00000102879.15	CORO1A	74	48	726	795
ENSG00000103647.12	CORO2B	11	8	103	136
ENSG00000214575.9	CPEB1	7	2	468	452
ENSG00000168993.14	CPLX1	92	66	1283	1246
ENSG00000021826.14	CPS1	137304	132775	1086	1092
ENSG00000110090.12	CPT1A	11648	11594	1677	1681
ENSG00000169169.14	CPT1C	96	82	819	796
ENSG00000088882.7	CPXM1	0	4	189	143
ENSG00000117322.16	CR2	4	4	278	260
ENSG00000130038.9	CRACR2A	2	0	2002	1896
ENSG00000148204.11	CRB2	35	14	159	167
ENSG00000182809.10	CRIP2	12866	11670	1485	1414
ENSG00000146215.13	CRIP3	120	66	657	683
ENSG00000006016.10	CRLF1	15737	14428	640	607
ENSG00000184371.13	CSF1	9169	22004	2260	2426
ENSG00000147408.14	CSGALNACT1	5493	4853	297	294
ENSG00000114646.9	CSPG5	214	173	1169	1138
ENSG00000178662.15	CSRNP3	0	2	506	426
ENSG00000124092.12	CTCFL	0	0	224	221
ENSG00000150281.6	CTF1	2	2	125	117
ENSG00000118523.5	CTGF	3338	2592	17262	18012
ENSG00000103811.15	CTSH	468	368	4433	4216
ENSG00000163131.10	CTSS	633	1924	122	108
ENSG00000136943.10	CTSV	513	562	5613	5521
ENSG00000111249.13	CUX2	1	5	1575	1557
ENSG00000006210.6	CX3CL1	0	10	272	294
ENSG00000107562.16	CXCL12	2	0	455	459
ENSG00000121966.6	CXCR4	19713	17745	650	646
ENSG00000147231.13	CXorf57	18	12	9196	8888
ENSG00000071967.11	CYBRD1	6344	5834	856	806
ENSG00000055163.19	CYFIP2	3841	2778	17967	18402
ENSG00000095596.11	CYP26A1	2	0	349	257
ENSG00000130649.9	CYP2E1	34	6	280	312
ENSG00000171954.12	CYP4F22	2	0	180	127
ENSG00000172817.3	CYP7B1	0	0	682	662
ENSG00000205795.4	CYS1	0	6	181	186
ENSG00000146122.16	DAAM2	8	8	2037	1980
ENSG00000173406.15	DAB1	2395	2258	157	151
ENSG00000153071.14	DAB2	30431	28911	3579	3556
ENSG00000276644.4	DACH1	2	0	831	765
ENSG00000197380.10	DACT3	21	6	719	727
ENSG00000196730.12	DAPK1	768	1076	5267	5286
ENSG00000105516.10	DBP	340	148	1685	1592
ENSG00000166341.7	DCHS1	19	30	402	351
ENSG00000172795.15	DCP2	2020	1903	13801	13161
ENSG00000168209.4	DDIT4	9525	8474	520	543
ENSG00000181418.7	DDN	365	211	2238	2365
ENSG00000162733.16	DDR2	157	152	1333	1325
ENSG00000107201.9	DDX58	1491	83050	523	3355
ENSG00000137628.16	DDX60	1581	18125	345	1003
ENSG00000181381.13	DDX60L	1867	28175	114	449
ENSG00000023892.10	DEF6	10	12	581	555
ENSG00000205744.9	DENND1C	27	15	124	94
ENSG00000146966.12	DENND2A	10	2	203	220
ENSG00000175984.14	DENND2C	109	116	1186	1184
ENSG00000175084.11	DES	56	94	509	518
ENSG00000077044.10	DGKD	30057	31486	5174	5114
ENSG00000104808.7	DHDH	19	22	127	88
ENSG00000100867.14	DHRS2	24	24	2576	2598
ENSG00000108771.12	DHX58	119	5276	196	810
ENSG00000176490.4	DIRAS1	469	373	2487	2322
ENSG00000164741.14	DLC1	18	10	2405	2469
ENSG00000186047.9	DLEU7	5	2	97	112
ENSG00000170579.15	DLGAP1	2	2	432	411
ENSG00000198719.8	DLL1	0	19	1737	1813
ENSG00000090932.10	DLL3	114	75	812	698
ENSG00000128917.6	DLL4	12	4	231	185
ENSG00000064195.7	DLX3	76	56	3144	3093
ENSG00000161249.20	DMKN	2	8	5536	5202
ENSG00000173253.15	DMRT2	0	1	1219	1083
ENSG00000064218.4	DMRT3	2	2	781	794
ENSG00000142700.11	DMRTA2	28	41	421	437
ENSG00000167646.13	DNAAF3	28	21	209	179
ENSG00000197653.15	DNAH10	4	6	340	307
ENSG00000187775.16	DNAH17	3283	2911	337	388
ENSG00000158486.13	DNAH3	6	6	142	172
ENSG00000115423.18	DNAH6	15	10	97	114
ENSG00000120675.5	DNAJC15	3853	3459	177	163
ENSG00000178401.14	DNAJC22	136	151	1781	1835
ENSG00000177692.11	DNAJC28	35	18	193	177
ENSG00000088305.18	DNMT3B	890	800	10324	9845
ENSG00000149927.17	DOC2A	76	54	495	475
ENSG00000272636.3	DOC2B	0	6	832	845
ENSG00000088538.12	DOCK3	339	235	2285	2415
ENSG00000107099.15	DOCK8	14	14	2007	1954
ENSG00000206052.10	DOK6	2	2	186	220
ENSG00000205683.11	DPF3	6	3	173	186
ENSG00000197635.9	DPP4	4	9	625	505
ENSG00000176978.13	DPP7	17109	15013	2585	2656
ENSG00000163530.4	DPPA2	6	0	477	448
ENSG00000188641.12	DPYD	4154	5772	535	595
ENSG00000151640.12	DPYSL4	33	49	703	843
ENSG00000157851.16	DPYSL5	78	44	10542	10393
ENSG00000144045.13	DQX1	18	9	125	188
ENSG00000136048.13	DRAM1	9571	11096	1200	1191
ENSG00000162490.6	DRAXIN	8	2	563	600
ENSG00000069696.6	DRD4	25	2	129	110
ENSG00000134762.16	DSC3	1074	861	6319	5952
ENSG00000167065.13	DUSP18	96	82	612	561
ENSG00000133878.8	DUSP26	12	2	212	206
ENSG00000130829.17	DUSP9	194	148	6341	6559
ENSG00000127334.10	DYRK2	1905	1556	11660	11478
ENSG00000198919.12	DZIP3	1065	883	5709	5704
ENSG00000221818.8	EBF2	2	0	649	553
ENSG00000108001.13	EBF3	2	0	2247	2170
ENSG00000088881.20	EBF4	22	29	774	810
ENSG00000171551.11	ECEL1	10140	9336	1542	1414
ENSG00000158813.17	EDA	24	10	1671	1427
ENSG00000131080.14	EDA2R	20	14	3198	3308
ENSG00000186197.13	EDARADD	16	2	360	326
ENSG00000164176.12	EDIL3	24226	22346	3478	3028
ENSG00000122547.10	EEPD1	176	70	1128	1218
ENSG00000186976.14	EFCAB6	8	4	157	149
ENSG00000172638.12	EFEMP2	337	252	4553	4338
ENSG00000183690.12	EFHC2	35	14	138	143
ENSG00000115468.11	EFHD1	168	142	3984	3925
ENSG00000099617.3	EFNA2	12	10	93	109
ENSG00000143590.13	EFNA3	141	76	604	546
ENSG00000090776.5	EFNB1	844	682	4548	4210
ENSG00000108947.4	EFNB3	2	4	1080	1149
ENSG00000084710.13	EFR3B	16	56	3141	3068
ENSG00000172889.15	EGFL7	407	340	7610	7697
ENSG00000173442.12	EHBP1L1	19690	19702	2865	3046
ENSG00000024422.11	EHD2	20500	18684	157	191
ENSG00000013016.15	EHD3	268	202	1696	1818
ENSG00000113790.10	EHHADH	350	334	1882	1909
ENSG00000163412.12	EIF4E3	232	244	1902	1830
ENSG00000107105.14	ELAVL2	0	0	272	261
ENSG00000163435.15	ELF3	4682	3446	275	269
ENSG00000225968.7	ELFN1	101	69	541	554
ENSG00000110675.12	ELMOD1	0	0	282	252
ENSG00000197977.3	ELOVL2	320	283	2998	2752
ENSG00000118402.5	ELOVL4	458	310	4086	3822
ENSG00000186998.15	EMID1	12	10	1010	904
ENSG00000138080.13	EMILIN1	75	89	428	395
ENSG00000132205.10	EMILIN2	412	370	7422	7405
ENSG00000183798.4	EMILIN3	4	4	3462	3513
ENSG00000142227.10	EMP3	10442	10239	1635	1626
ENSG00000135638.13	EMX1	2	0	1061	930
ENSG00000170370.11	EMX2	0	0	404	427
ENSG00000164778.4	EN2	14	2	8589	8787
ENSG00000171617.13	ENC1	1027	733	5207	5193
ENSG00000106991.13	ENG	18173	16064	323	253
ENSG00000168913.6	ENHO	13	10	399	454
ENSG00000108515.17	ENO3	29807	19932	1041	1015
ENSG00000138792.9	ENPEP	4	0	628	726
ENSG00000136960.12	ENPP2	10	4	789	724
ENSG00000001561.6	ENPP4	4	2	3244	2974
ENSG00000112796.9	ENPP5	0	0	530	514
ENSG00000163508.12	EOMES	34	12	304	358
ENSG00000082397.17	EPB41L3	72	73	9107	8886
ENSG00000129595.12	EPB41L4A	3876	3003	370	394
ENSG00000115109.13	EPB41L5	519	512	3985	3901
ENSG00000183317.16	EPHA10	11	12	245	267
ENSG00000116106.11	EPHA4	101	69	1840	1605
ENSG00000070886.11	EPHA8	2	0	205	233
ENSG00000154928.16	EPHB1	0	2	1225	1137
ENSG00000182580.2	EPHB3	44	20	1748	1578
ENSG00000106123.11	EPHB6	4	8	553	570
ENSG00000120915.13	EPHX2	169	155	1734	1596
ENSG00000172031.6	EPHX4	76	83	603	547
ENSG00000049283.17	EPN3	18	14	303	256
ENSG00000133106.14	EPSTI1	17	17	317	1098
ENSG00000065361.14	ERBB3	65	57	1039	1047
ENSG00000187672.12	ERC2	29	20	186	212
ENSG00000178752.15	ERFE	142	85	949	762
ENSG00000177459.10	ERICH5	4	4	1280	1401
ENSG00000086619.13	ERO1B	198	156	2111	1963
ENSG00000149564.11	ESAM	27	40	321	309
ENSG00000104413.15	ESRP1	2	0	896	953
ENSG00000123576.5	ESX1	0	0	254	193
ENSG00000143845.14	ETNK2	174	158	1600	1581
ENSG00000157557.11	ETS2	30104	29645	2629	2517
ENSG00000175832.12	ETV4	3518	2394	136	173
ENSG00000010030.13	ETV7	6	2074	147	127
ENSG00000110723.11	EXPH5	296	324	2774	2613
ENSG00000158008.9	EXTL1	0	0	199	151
ENSG00000064655.18	EYA2	15	27	1819	1746
ENSG00000126218.11	F10	18	25	553	556
ENSG00000164251.4	F2RL1	250	224	8007	7330
ENSG00000117480.15	FAAH	48	44	2569	2751
ENSG00000135472.8	FAIM2	2	0	146	171
ENSG00000178882.14	FAM101A	5	2	1177	1217
ENSG00000166801.15	FAM111A	3713	9179	338	480
ENSG00000121104.7	FAM117A	19	6	2357	2438
ENSG00000136830.11	FAM129B	52187	62203	9749	10211
ENSG00000184163.3	FAM132A	22	45	161	227
ENSG00000109794.13	FAM149A	117	124	952	910
ENSG00000130054.4	FAM155B	4	2	1152	1073
ENSG00000145642.11	FAM159B	0	1	211	156
ENSG00000154319.14	FAM167A	16	8	122	120
ENSG00000198780.11	FAM169A	500	548	3981	4367
ENSG00000161682.14	FAM171A2	290	197	2500	2180
ENSG00000185442.12	FAM174B	113	79	1383	1209
ENSG00000182103.4	FAM181B	0	0	130	112
ENSG00000104059.4	FAM189A1	0	0	272	292
ENSG00000144649.8	FAM198A	27	16	348	318
ENSG00000164125.15	FAM198B	10	2	122	99
ENSG00000219438.8	FAM19A5	0	2	361	380
ENSG00000197852.9	FAM212B	228	188	1245	1235
ENSG00000250486.3	FAM218A	0	0	124	122
ENSG00000139438.5	FAM222A	233	125	1188	1324
ENSG00000084444.13	FAM234B	1033	1110	5636	5611
ENSG00000178033.5	FAM26E	16	36	460	449
ENSG00000183114.7	FAM43B	38	24	581	675
ENSG00000112773.15	FAM46A	12712	15959	966	1134
ENSG00000158246.7	FAM46B	318	212	1744	1864
ENSG00000183508.4	FAM46C	46	188	1428	1422
ENSG00000197872.11	FAM49A	16	19	335	268
ENSG00000111913.16	FAM65B	24	71	627	595
ENSG00000165716.10	FAM69B	112	59	11008	11032
ENSG00000142530.10	FAM71E1	35	53	264	259
ENSG00000126882.12	FAM78A	77	44	1816	1617
ENSG00000105523.3	FAM83E	0	2	103	110
ENSG00000168672.3	FAM84B	91	292	6926	6624
ENSG00000182118.6	FAM89A	139	144	4642	4566
ENSG00000171847.10	FAM90A1	0	0	309	291
ENSG00000086570.12	FAT2	70	66	1359	1297
ENSG00000165323.15	FAT3	13	14	2554	2273
ENSG00000140092.14	FBLN5	13165	14437	1415	1195
ENSG00000166147.13	FBN1	74015	86872	3569	3524
ENSG00000142449.12	FBN3	5	0	131	119
ENSG00000127585.11	FBXL16	2081	1562	167	176
ENSG00000214050.7	FBXO16	24	13	239	235
ENSG00000161243.8	FBXO27	117	95	593	552
ENSG00000156804.7	FBXO32	6218	5199	866	741
ENSG00000132879.13	FBXO44	783	723	3705	3886
ENSG00000104870.12	FCGRT	228	264	3454	3398
ENSG00000182511.11	FES	15	13	103	112
ENSG00000149557.12	FEZ1	4	8	930	854
ENSG00000127084.17	FGD3	65	68	496	480
ENSG00000154783.10	FGD5	0	1	191	209
ENSG00000114279.13	FGF12	1790	1614	128	118
ENSG00000129682.14	FGF13	0	2	115	115
ENSG00000118972.1	FGF23	0	0	122	108
ENSG00000138675.16	FGF5	10	2	274	243
ENSG00000102678.6	FGF9	0	0	187	147
ENSG00000066468.21	FGFR2	12	8	5484	5464
ENSG00000068078.17	FGFR3	589	495	17815	18551
ENSG00000142621.19	FHAD1	13	28	351	351
ENSG00000022267.16	FHL1	5582	4516	60157	60932
ENSG00000118407.14	FILIP1	7	4	351	351
ENSG00000168386.18	FILIP1L	3	0	110	110
ENSG00000119782.13	FKBP1B	37	36	490	461
ENSG00000143631.10	FLG	21	16	779	863
ENSG00000151702.16	FLI1	98	182	713	745
ENSG00000102755.10	FLT1	4	0	2557	2656
ENSG00000122025.14	FLT3	0	0	358	402
ENSG00000037280.15	FLT4	12	8	4158	4257
ENSG00000248905.8	FMN1	528	627	106	103
ENSG00000184922.13	FMNL1	9054	11509	672	750
ENSG00000076258.9	FMO4	33	48	263	258
ENSG00000115226.9	FNDC4	84	85	732	749
ENSG00000160097.15	FNDC5	35	16	381	347
ENSG00000110195.11	FOLR1	10225	9181	1499	1467
ENSG00000125798.14	FOXA2	0	0	234	176
ENSG00000170608.2	FOXA3	2	2	160	146
ENSG00000171956.6	FOXB1	0	2	416	429
ENSG00000251493.4	FOXD1	79	55	1967	1945
ENSG00000186564.5	FOXD2	255	216	1212	1238
ENSG00000187140.5	FOXD3	32	14	272	259
ENSG00000178919.8	FOXE1	1909	1202	204	206
ENSG00000176165.10	FOXG1	0	2	1259	1296
ENSG00000214336.4	FOXI3	0	0	1284	1313
ENSG00000176678.5	FOXL1	1412	977	162	161
ENSG00000139445.17	FOXN4	3	2	188	160
ENSG00000150907.7	FOXO1	300	210	4013	3952
ENSG00000164379.6	FOXQ1	2602	3221	119	93
ENSG00000150893.10	FREM2	4	4	2997	2649
ENSG00000151474.20	FRMD4A	175	151	898	983
ENSG00000114541.14	FRMD4B	29	30	919	923
ENSG00000070601.9	FRMPD1	2	0	118	109
ENSG00000170324.20	FRMPD2	0	0	388	449
ENSG00000147234.10	FRMPD3	36	25	252	267
ENSG00000070404.9	FSTL3	26579	23670	909	792
ENSG00000167996.15	FTH1	149130	146104	18543	18751
ENSG00000174951.10	FUT1	20	24	666	666
ENSG00000137726.16	FXYD6	0	0	975	824
ENSG00000104290.10	FZD3	158	136	4282	3793
ENSG00000155760.2	FZD7	587	745	5748	5240
ENSG00000177283.6	FZD8	581	574	4613	4202
ENSG00000188763.4	FZD9	122	64	514	502
ENSG00000160211.15	G6PD	31056	30529	5708	5819
ENSG00000151834.15	GABRA2	0	0	339	299
ENSG00000187730.7	GABRD	0	0	218	177
ENSG00000102287.17	GABRE	29626	41496	4690	4800
ENSG00000130222.10	GADD45G	2	6	292	361
ENSG00000128242.12	GAL3ST1	0	0	217	264
ENSG00000141429.13	GALNT1	32415	26456	5752	5547
ENSG00000119514.6	GALNT12	102	76	607	588
ENSG00000158089.14	GALNT14	6	6	363	312
ENSG00000100626.16	GALNT16	97	74	867	808
ENSG00000110328.5	GALNT18	34	36	1233	1305
ENSG00000143641.9	GALNT2	88901	95106	12313	11757
ENSG00000136542.8	GALNT5	10	6	275	266
ENSG00000139629.15	GALNT6	66	58	2745	2622
ENSG00000130035.6	GALNT8	0	2	242	194
ENSG00000172020.12	GAP43	26	22	455	425
ENSG00000157833.12	GAREM2	534	489	3312	3078
ENSG00000007237.18	GAS7	310	207	2949	2728
ENSG00000107485.15	GATA3	52	69	2256	2376
ENSG00000136574.17	GATA4	0	0	992	922
ENSG00000130700.6	GATA5	6	6	224	256
ENSG00000148288.11	GBGT1	84	71	2788	2815
ENSG00000117228.9	GBP1	8870	105191	107	185
ENSG00000162645.12	GBP2	8316	27018	330	351
ENSG00000168505.6	GBX2	96	59	413	429
ENSG00000156466.9	GDF6	6	2	2714	2678
ENSG00000143869.6	GDF7	4	8	1671	1607
ENSG00000168621.14	GDNF	4	0	1089	1214
ENSG00000153982.10	GDPD1	91	67	1003	995
ENSG00000131095.11	GFAP	8	2	215	192
ENSG00000162676.11	GFI1	17	22	935	887
ENSG00000151892.14	GFRA1	4	4	642	642
ENSG00000168546.10	GFRA2	0	0	308	318
ENSG00000261949.5	GFY	30	15	539	505
ENSG00000112964.13	GHR	14	2	446	447
ENSG00000159224.4	GIP	24	8	127	132
ENSG00000010310.8	GIPR	37	21	248	212
ENSG00000121743.3	GJA3	0	4	1022	1034
ENSG00000165474.5	GJB2	20	56	1694	1529
ENSG00000164411.11	GJB7	30	37	438	348
ENSG00000166105.15	GLB1L3	0	9	1375	1380
ENSG00000178445.8	GLDC	30	27	4622	4407
ENSG00000186417.13	GLDN	0	21	111	141
ENSG00000111087.9	GLI1	63	53	329	318
ENSG00000135423.12	GLS2	12	19	179	216
ENSG00000151948.11	GLT1D1	2	4	1273	1191
ENSG00000166840.13	GLYATL1	0	1	114	118
ENSG00000127920.5	GNG11	12063	11011	674	708
ENSG00000186469.8	GNG2	54	44	274	256
ENSG00000168243.10	GNG4	100	86	1539	1469
ENSG00000176533.12	GNG7	0	2	799	723
ENSG00000261794.1	GOLGA8H	20	16	190	171
ENSG00000185245.7	GP1BA	36	53	292	233
ENSG00000063660.8	GPC1	25243	24167	4800	4799
ENSG00000147257.13	GPC3	2	4	2759	2519
ENSG00000076716.8	GPC4	18	24	8533	7889
ENSG00000183098.10	GPC6	0	0	644	603
ENSG00000149735.6	GPHA2	0	0	93	117
ENSG00000164849.9	GPR146	24	8	140	69
ENSG00000173890.16	GPR160	114	61	1070	852
ENSG00000250510.7	GPR162	71	62	845	806
ENSG00000204882.3	GPR20	31	16	150	140
ENSG00000170837.2	GPR27	0	0	2108	1997
ENSG00000170775.2	GPR37	1972	2485	257	223
ENSG00000112218.8	GPR63	115	159	1812	1694
ENSG00000155269.11	GPR78	14	8	169	150
ENSG00000123901.8	GPR83	14	12	120	116
ENSG00000164604.12	GPR85	0	1	114	92
ENSG00000167191.11	GPRC5B	412	334	2557	2559
ENSG00000170412.16	GPRC5C	197	189	3008	2768
ENSG00000213654.9	GPSM3	30	39	443	402
ENSG00000211445.11	GPX3	184	182	7037	6479
ENSG00000178075.19	GRAMD1C	20	47	482	497
ENSG00000161835.10	GRASP	7	6	549	523
ENSG00000115290.9	GRB14	185	179	1070	978
ENSG00000196208.13	GREB1	30	14	2013	2046
ENSG00000166923.10	GREM1	4191	3526	704	775
ENSG00000134317.17	GRHL1	89	137	1444	1572
ENSG00000158055.15	GRHL3	21	26	417	421
ENSG00000182771.18	GRID1	16	16	450	415
ENSG00000215045.8	GRID2IP	0	0	130	116
ENSG00000149403.11	GRIK4	4	0	548	529
ENSG00000105737.9	GRIK5	4	10	531	591
ENSG00000176884.14	GRIN1	80	79	453	406
ENSG00000155974.11	GRIP1	41	27	905	926
ENSG00000100077.14	GRK3	425	264	3402	3309
ENSG00000124493.13	GRM4	2	6	188	143
ENSG00000133937.4	GSC	2	0	323	381
ENSG00000073605.18	GSDMB	111	158	1491	1456
ENSG00000148180.18	GSN	2116	1991	249	175
ENSG00000189369.8	GSPT2	2	8	1332	1276
ENSG00000213366.12	GSTM2	145	84	1916	1901
ENSG00000134202.10	GSTM3	9674	8260	1782	1791
ENSG00000164116.16	GUCY1A3	0	2	650	611
ENSG00000061918.12	GUCY1B3	6	2	1453	1351
ENSG00000279968.1	GVQW2	5	2	420	351
ENSG00000056998.18	GYG2	187	150	1035	1168
ENSG00000136732.14	GYPC	2	4	352	384
ENSG00000246705.4	H2AFJ	3564	3143	536	497
ENSG00000099284.13	H2AFY2	18	9	4500	4763
ENSG00000162882.14	HAAO	4	0	180	181
ENSG00000130956.13	HABP4	970	848	4776	4831
ENSG00000113196.2	HAND1	2	6	5229	4759
ENSG00000164107.8	HAND2	0	0	302	252
ENSG00000173805.15	HAP1	51	46	935	1001
ENSG00000103044.10	HAS3	60	40	523	478
ENSG00000086506.2	HBQ1	17	17	102	101
ENSG00000138622.3	HCN4	0	0	219	206
ENSG00000184508.10	HDDC3	294	231	1318	1455
ENSG00000187821.8	HELT	0	0	146	129
ENSG00000130589.16	HELZ2	2120	119572	2038	9299
ENSG00000138642.14	HERC6	615	14694	586	976
ENSG00000114315.3	HES1	968	894	5213	5099
ENSG00000069812.11	HES2	28	14	166	124
ENSG00000197921.5	HES5	0	0	312	316
ENSG00000164683.16	HEY1	558	434	10387	9870
ENSG00000135547.8	HEY2	40	66	724	754
ENSG00000163909.7	HEYL	24	12	2018	1921
ENSG00000162669.15	HFM1	18	14	224	194
ENSG00000054392.12	HHAT	168	116	804	714
ENSG00000169635.9	HIC2	644	582	6629	6976
ENSG00000167861.15	HID1	66	37	1297	1402
ENSG00000100644.16	HIF1A	37149	47600	6566	6734
ENSG00000184678.10	HIST2H2BE	1366	1417	284	268
ENSG00000206503.11	HLA-A	75546	83540	9607	9260
ENSG00000234745.9	HLA-B	50370	73868	4583	5066
ENSG00000204252.13	HLA-DOA	8	6	334	344
ENSG00000231389.7	HLA-DPA1	152	230	2487	2396
ENSG00000223865.10	HLA-DPB1	141	106	1988	1733
ENSG00000179344.16	HLA-DQB1	31	37	1126	1096
ENSG00000196126.10	HLA-DRB1	212	174	1056	1094
ENSG00000204642.13	HLA-F	2439	6715	638	733
ENSG00000108924.13	HLF	43	14	451	396
ENSG00000148357.16	HMCN2	0	9	258	198
ENSG00000149948.13	HMGA2	123	70	23057	22627
ENSG00000215612.7	HMX1	2	2	2538	2730
ENSG00000188620.9	HMX3	927	675	108	123
ENSG00000241935.8	HOGA1	22	17	306	348
ENSG00000152413.14	HOMER1	1124	881	5149	5260
ENSG00000103942.12	HOMER2	98	79	6927	6890
ENSG00000105996.6	HOXA2	11	8	183	140
ENSG00000105997.22	HOXA3	112	93	735	725
ENSG00000106004.4	HOXA5	185	160	996	989
ENSG00000159184.7	HOXB13	384	262	2696	2887
ENSG00000120068.6	HOXB8	22	25	970	867
ENSG00000170689.9	HOXB9	425	544	6245	6036
ENSG00000037965.5	HOXC8	287	426	1792	1829
ENSG00000128710.5	HOXD10	8	5	3098	2975
ENSG00000128713.12	HOXD11	11	12	819	753
ENSG00000128714.5	HOXD13	10	10	6393	6281
ENSG00000175879.8	HOXD8	176	96	1092	1017
ENSG00000128709.12	HOXD9	331	247	1590	1377
ENSG00000115756.12	HPCAL1	11937	10789	2218	2250
ENSG00000116983.12	HPCAL4	0	0	923	906
ENSG00000158104.11	HPD	2334	2088	147	132
ENSG00000168453.14	HR	4233	3485	181	227
ENSG00000127252.5	HRASLS	18	8	1093	1114
ENSG00000113749.7	HRH2	0	4	187	150
ENSG00000135116.9	HRK	22	20	1589	1499
ENSG00000153976.2	HS3ST3A1	28	20	927	828
ENSG00000136720.6	HS6ST1	2005	1547	9542	9522
ENSG00000185352.8	HS6ST3	3277	3319	159	98
ENSG00000087076.8	HSD17B14	0	7	307	327
ENSG00000025423.11	HSD17B6	85	55	546	545
ENSG00000099377.13	HSD3B7	770	868	127	125
ENSG00000132622.10	HSPA12B	14	15	93	121
ENSG00000204388.6	HSPA1B	9135	10983	128056	118284
ENSG00000106211.8	HSPB1	47030	43261	8535	8682
ENSG00000173641.17	HSPB7	36	42	313	282
ENSG00000142798.17	HSPG2	56683	56881	3612	3475
ENSG00000166033.11	HTRA1	13627	13085	2387	1995
ENSG00000122986.13	HVCN1	19	14	177	125
ENSG00000134330.18	IAH1	2753	2612	152	153
ENSG00000115738.9	ID2	2566	3378	14921	15039
ENSG00000172201.11	ID4	21	29	22826	22613
ENSG00000010295.19	IFFO1	34	28	4897	4991
ENSG00000165949.12	IFI27	160	14027	245	1170
ENSG00000068079.7	IFI35	1308	19655	768	1323
ENSG00000137965.10	IFI44	1153	26041	48	457
ENSG00000137959.15	IFI44L	2424	59952	150	2588
ENSG00000126709.14	IFI6	1834	69065	1025	5804
ENSG00000115267.5	IFIH1	412	24206	270	1354
ENSG00000185745.9	IFIT1	1259	149445	618	11434
ENSG00000119922.9	IFIT2	1228	102514	156	2079
ENSG00000119917.13	IFIT3	881	89298	221	3935
ENSG00000142089.15	IFITM3	21938	54253	5072	7962
ENSG00000174498.13	IGDCC3	6	0	927	854
ENSG00000103742.11	IGDCC4	12	12	1270	1219
ENSG00000167244.18	IGF2	18	8	2523	2409
ENSG00000073792.15	IGF2BP2	233	271	12693	12587
ENSG00000115457.9	IGFBP2	94	64	5282	5115
ENSG00000141753.6	IGFBP4	39307	48706	830	894
ENSG00000167779.7	IGFBP6	1640	1617	206	202
ENSG00000163453.11	IGFBP7	21563	20128	2447	2527
ENSG00000137142.4	IGFBPL1	64	67	956	864
ENSG00000163395.16	IGFN1	24497	19931	268	290
ENSG00000152580.8	IGSF10	31987	31315	312	307
ENSG00000144847.12	IGSF11	0	0	480	513
ENSG00000080854.14	IGSF9B	0	0	461	460
ENSG00000161405.16	IKZF3	6	4	792	722
ENSG00000110324.10	IL10RA	6	18	136	176
ENSG00000095752.6	IL11	1614	1042	131	124
ENSG00000134470.20	IL15RA	863	2726	82	131
ENSG00000144730.16	IL17RD	242	160	1145	1134
ENSG00000115594.11	IL1R1	3404	5592	482	573
ENSG00000100385.13	IL2RB	48	30	706	709
ENSG00000164509.13	IL31RA	12	8	114	114
ENSG00000008517.16	IL32	3105	3842	612	510
ENSG00000143195.12	ILDR2	4	0	1167	1110
ENSG00000184903.9	IMMP2L	1925	1702	270	313
ENSG00000203485.12	INF2	20515	18860	3416	3456
ENSG00000163083.5	INHBB	2	2	1314	1212
ENSG00000168918.13	INPP5D	34	25	2183	2284
ENSG00000165359.14	INTS6L	200	290	1620	1629
ENSG00000074706.13	IPCEF1	0	0	171	165
ENSG00000125347.13	IRF1	1902	13676	1028	1263
ENSG00000168310.10	IRF2	1337	5721	479	557
ENSG00000137265.14	IRF4	8	0	126	118
ENSG00000140968.10	IRF8	6	0	372	407
ENSG00000113430.9	IRX4	4	0	405	377
ENSG00000159387.7	IRX6	5	1	416	354
ENSG00000187608.8	ISG15	5391	112315	521	5427
ENSG00000172183.14	ISG20	282	4210	295	269
ENSG00000100593.17	ISM2	2	2	152	199
ENSG00000105655.18	ISYNA1	369	246	15793	16262
ENSG00000137809.16	ITGA11	10055	9448	260	228
ENSG00000005961.17	ITGA2B	106	85	2177	2311
ENSG00000005884.17	ITGA3	24828	27000	1882	1895
ENSG00000144668.11	ITGA9	9	2	138	115
ENSG00000132470.13	ITGB4	7201	10335	186	128
ENSG00000105855.9	ITGB8	5223	5950	869	890
ENSG00000123243.14	ITIH5	6	6	120	137
ENSG00000150995.18	ITPR1	24233	19611	1121	974
ENSG00000148841.15	ITPRIP	14069	15843	1747	1676
ENSG00000198885.9	ITPRIPL1	60	30	3905	3602
ENSG00000043143.20	JADE2	8761	17375	1853	1782
ENSG00000105639.18	JAK3	25	25	296	269
ENSG00000176049.15	JAKMIP2	12	19	1137	1079
ENSG00000166086.12	JAM3	179	162	7874	7572
ENSG00000149596.6	JPH2	3851	2694	169	217
ENSG00000092051.16	JPH4	1	4	177	158
ENSG00000177606.6	JUN	1944	1630	16269	15974
ENSG00000171223.5	JUNB	9176	9825	1672	1562
ENSG00000186994.11	KANK3	0	2	407	356
ENSG00000176595.3	KBTBD11	62	76	803	761
ENSG00000163376.11	KBTBD8	116	106	988	1075
ENSG00000129159.6	KCNC1	2	4	491	374
ENSG00000131398.13	KCNC3	0	4	1697	1516
ENSG00000116396.14	KCNC4	1050	921	13814	13337
ENSG00000171385.9	KCND3	4	22	913	917
ENSG00000055118.14	KCNH2	10	10	698	678
ENSG00000168135.4	KCNJ4	0	1	172	128
ENSG00000121361.3	KCNJ8	0	2	2138	2123
ENSG00000156113.21	KCNMA1	10	4	126	89
ENSG00000135643.4	KCNMB4	392	280	1915	1844
ENSG00000105642.15	KCNN1	28	23	321	330
ENSG00000143603.18	KCNN3	4	0	170	82
ENSG00000075043.18	KCNQ2	2	6	1006	992
ENSG00000117013.14	KCNQ4	54	42	910	861
ENSG00000185760.15	KCNQ5	1	2	1396	1287
ENSG00000107147.12	KCNT1	3	4	469	527
ENSG00000135253.13	KCP	18	21	1156	1154
ENSG00000168676.10	KCTD19	28	13	237	229
ENSG00000186280.6	KDM4D	140	120	616	750
ENSG00000131773.13	KHDRBS3	1593	1424	215	224
ENSG00000102445.18	KIAA0226L	2	0	630	586
ENSG00000196872.11	KIAA1211L	6	2	160	152
ENSG00000120549.17	KIAA1217	4795	10643	1168	1116
ENSG00000114656.10	KIAA1257	4	1	306	314
ENSG00000250305.8	KIAA1456	12	8	160	146
ENSG00000165757.8	KIAA1462	39	30	4462	4396
ENSG00000110427.14	KIAA1549L	14	6	1229	1147
ENSG00000136883.12	KIF12	13	26	281	414
ENSG00000117245.12	KIF17	37	8	627	628
ENSG00000130294.14	KIF1A	6	3	3930	4060
ENSG00000116852.14	KIF21B	64	49	878	866
ENSG00000155980.11	KIF5A	54	38	2326	2173
ENSG00000168280.16	KIF5C	154	267	3029	2882
ENSG00000164627.17	KIF6	0	0	168	156
ENSG00000140859.15	KIFC3	11712	11978	2100	2182
ENSG00000157404.15	KIT	34	22	3954	3678
ENSG00000104892.16	KLC3	42	30	1033	1072
ENSG00000266265.2	KLF14	1	6	126	82
ENSG00000163884.3	KLF15	14	2	629	704
ENSG00000118263.14	KLF7	3610	2405	194	188
ENSG00000102349.16	KLF8	0	2	1021	941
ENSG00000179023.8	KLHDC7A	4	0	442	364
ENSG00000003096.13	KLHL13	10158	8162	1700	1659
ENSG00000197705.9	KLHL14	0	2	143	187
ENSG00000174010.9	KLHL15	2330	1940	57796	54698
ENSG00000146021.14	KLHL3	144	104	975	881
ENSG00000239474.6	KLHL41	4	5	127	115
ENSG00000167748.10	KLK1	38	62	504	594
ENSG00000167759.12	KLK13	2	0	92	123
ENSG00000129437.9	KLK14	15	15	261	227
ENSG00000167755.13	KLK6	0	0	303	234
ENSG00000169035.11	KLK7	0	0	139	136
ENSG00000129455.15	KLK8	0	0	266	282
ENSG00000171798.17	KNDC1	29	27	619	670
ENSG00000183762.12	KREMEN1	922	758	8586	8573
ENSG00000128422.15	KRT17	121682	153040	1823	2126
ENSG00000213424.8	KRT222	0	0	163	132
ENSG00000135480.14	KRT7	109256	101376	138	138
ENSG00000167767.13	KRT80	26093	18266	135	145
ENSG00000171435.13	KSR2	2	0	327	313
ENSG00000115919.14	KYNU	18619	22731	153	164
ENSG00000198910.12	L1CAM	79143	79734	2494	2277
ENSG00000154655.15	L3MBTL4	0	2	325	425
ENSG00000112769.18	LAMA4	13264	11351	1295	1238
ENSG00000196878.13	LAMB3	22622	20277	683	727
ENSG00000133424.20	LARGE1	2	8	2039	1946
ENSG00000204381.11	LAYN	4	6	1353	1336
ENSG00000138136.6	LBX1	0	0	554	566
ENSG00000179528.15	LBX2	49	32	204	214
ENSG00000182866.16	LCK	4	8	108	94
ENSG00000177984.6	LCN15	0	0	183	177
ENSG00000166796.11	LDHC	2	0	1224	1043
ENSG00000168675.18	LDLRAD4	2711	2117	332	320
ENSG00000145826.8	LECT2	1	0	169	143
ENSG00000138795.9	LEF1	10	4	3795	3604
ENSG00000100097.11	LGALS1	31611	29441	674	865
ENSG00000116977.18	LGALS8	4075	8170	1125	1018
ENSG00000153012.11	LGI2	16	14	2091	1786
ENSG00000139292.12	LGR5	231	141	3766	3411
ENSG00000273706.4	LHX1	0	0	853	868
ENSG00000106852.15	LHX6	285	233	1336	1423
ENSG00000162624.14	LHX8	6	2	233	225
ENSG00000244482.10	LILRA6	18	19	111	123
ENSG00000204577.11	LILRB3	42	32	276	275
ENSG00000064042.17	LIMCH1	53747	48597	4460	4070
ENSG00000136490.8	LIMD2	296	286	4301	4337
ENSG00000187772.7	LIN28B	8	6	9378	9684
ENSG00000111052.7	LIN7A	23	16	273	271
ENSG00000237489.3	LINC00959	4	11	147	151
ENSG00000169783.12	LINGO1	10	19	1213	1130
ENSG00000079435.9	LIPE	102	100	802	876
ENSG00000175536.6	LIPT2	122	148	656	718
ENSG00000071282.11	LMCD1	172	66	1120	1151
ENSG00000103227.18	LMF1	50	41	1886	1809
ENSG00000160789.19	LMNA	69524	83888	14850	15379
ENSG00000136153.19	LMO7	17276	21058	3336	3193
ENSG00000163431.12	LMOD1	26	20	334	346
ENSG00000142235.8	LMTK3	133	119	667	686
ENSG00000136944.17	LMX1B	0	4	3074	3253
ENSG00000170500.12	LONRF2	790	342	6644	6377
ENSG00000113083.12	LOX	12213	12332	1341	1265
ENSG00000198121.13	LPAR1	340	265	2374	2198
ENSG00000171517.5	LPAR3	74	88	1022	879
ENSG00000184574.9	LPAR5	68	32	359	308
ENSG00000175445.14	LPL	27459	25318	1037	872
ENSG00000121207.11	LRAT	20	6	170	154
ENSG00000130224.14	LRCH2	2	2	3439	3647
ENSG00000120256.9	LRP11	18361	18818	3443	3034
ENSG00000168702.17	LRP1B	913	922	130	103
ENSG00000081479.12	LRP2	8	4	3617	3212
ENSG00000128606.12	LRRC17	3	5	111	120
ENSG00000125122.15	LRRC29	16	32	139	182
ENSG00000137507.11	LRRC32	32	48	218	191
ENSG00000171757.15	LRRC34	33	26	899	1010
ENSG00000128594.7	LRRC4	22	6	12111	11105
ENSG00000131409.12	LRRC4B	6	6	1677	1689
ENSG00000173988.12	LRRC63	2	0	91	114
ENSG00000033122.18	LRRC7	139	127	1039	974
ENSG00000131951.10	LRRC9	0	0	167	163
ENSG00000125872.7	LRRN4	2	0	187	160
ENSG00000176204.13	LRRTM4	24	20	586	590
ENSG00000185565.11	LSAMP	8	9	270	240
ENSG00000105699.16	LSR	674	638	4019	3953
ENSG00000119681.11	LTBP2	4309	4181	774	753
ENSG00000062524.15	LTK	5	8	936	1012
ENSG00000139329.4	LUM	3382	2684	298	245
ENSG00000171357.5	LURAP1	4	4	137	95
ENSG00000160886.13	LY6K	8151	7332	294	354
ENSG00000104903.4	LYL1	26	26	345	371
ENSG00000232859.9	LYRM9	23	25	124	123
ENSG00000140280.13	LYSMD2	1162	1768	204	180
ENSG00000061337.15	LZTS1	0	4	4690	4916
ENSG00000183833.16	MAATS1	37	34	222	180
ENSG00000180660.7	MAB21L1	2	2	215	226
ENSG00000178573.6	MAF	6	10	581	412
ENSG00000182759.3	MAFA	28	28	2587	2435
ENSG00000204103.3	MAFB	158	202	1909	1948
ENSG00000179222.17	MAGED1	216	258	39636	39771
ENSG00000198934.4	MAGEE1	0	2	894	814
ENSG00000187601.4	MAGEH1	8	4	1294	1136
ENSG00000187391.19	MAGI2	26	16	273	266
ENSG00000165072.9	MAMDC2	2576	1878	181	161
ENSG00000013619.13	MAMLD1	3455	3594	526	476
ENSG00000176909.11	MAMSTR	59	41	460	432
ENSG00000117643.14	MAN1C1	11	15	1145	1089
ENSG00000189221.9	MAOA	284	200	2671	2708
ENSG00000197769.5	MAP1LC3C	2	2	347	362
ENSG00000078018.19	MAP2	1650	5305	239	180
ENSG00000180815.14	MAP3K15	58	52	809	747
ENSG00000104814.12	MAP4K1	37	27	237	223
ENSG00000171533.11	MAP6	4	4	581	579
ENSG00000180834.7	MAP6D1	367	241	1583	1580
ENSG00000135525.18	MAP7	16429	15886	2664	2661
ENSG00000164114.18	MAP9	2	2	3238	3259
ENSG00000109339.18	MAPK10	18	14	100	119
ENSG00000156711.16	MAPK13	223	173	5137	4959
ENSG00000008735.13	MAPK8IP2	286	660	5027	5068
ENSG00000186868.15	MAPT	87	46	1139	1077
ENSG00000140832.9	MARVELD3	29	26	896	805
ENSG00000007264.14	MATK	38	24	528	513
ENSG00000076706.15	MCAM	39223	34070	7227	7036
ENSG00000126217.20	MCF2L	41	52	935	998
ENSG00000053524.11	MCF2L2	63	55	361	361
ENSG00000153898.12	MCOLN2	250	262	1627	1632
ENSG00000175471.19	MCTP1	3052	2969	394	397
ENSG00000112139.14	MDGA1	64	56	743	796
ENSG00000110492.15	MDK	804	1816	19817	18855
ENSG00000135679.22	MDM2	5295	5930	35725	34843
ENSG00000144893.12	MED12L	39	38	1294	1291
ENSG00000145794.16	MEGF10	0	0	475	466
ENSG00000157890.17	MEGF11	21	13	355	305
ENSG00000162591.15	MEGF6	5838	5429	822	758
ENSG00000167077.12	MEI1	1621	1425	101	106
ENSG00000180336.17	MEIOC	80	78	565	518
ENSG00000143995.19	MEIS1	8839	7587	1112	1163
ENSG00000005102.12	MEOX1	968	598	152	142
ENSG00000153208.16	MERTK	22	19	1471	1516
ENSG00000105976.14	MET	38687	40042	6357	5671
ENSG00000170439.6	METTL7B	318	213	1373	1294
ENSG00000140545.14	MFGE8	807	706	18620	18311
ENSG00000196312.12	MFSD14C	558	584	3410	2978
ENSG00000168389.17	MFSD2A	261	176	1668	1693
ENSG00000174514.12	MFSD4A	25	29	154	177
ENSG00000151690.14	MFSD6	3250	2854	586	530
ENSG00000128268.11	MGAT3	2	2	1650	1386
ENSG00000071073.12	MGAT4A	36	32	2114	2055
ENSG00000074416.13	MGLL	9744	9231	941	943
ENSG00000008394.12	MGST1	16274	14178	1964	1907
ENSG00000155970.11	MICU3	0	0	140	142
ENSG00000099812.8	MISP	10009	10174	300	361
ENSG00000168404.12	MLKL	3059	10543	933	985
ENSG00000196549.10	MME	67	71	1370	1267
ENSG00000156103.15	MMP16	2	0	161	157
ENSG00000008516.16	MMP25	46	55	300	309
ENSG00000130675.14	MNX1	72	38	2327	2181
ENSG00000075643.5	MOCOS	9864	12106	710	752
ENSG00000124615.17	MOCS1	0	2	2231	2199
ENSG00000139714.12	MORN3	8	10	192	211
ENSG00000079931.14	MOXD1	70	74	1115	1000
ENSG00000130830.14	MPP1	274	251	2997	2820
ENSG00000011028.13	MRC2	25595	24158	4865	4466
ENSG00000135097.6	MSI1	6	4	4675	4762
ENSG00000175806.14	MSRA	763	663	138	142
ENSG00000148450.12	MSRB2	1872	1745	259	321
ENSG00000120149.8	MSX2	262	218	3789	3534
ENSG00000198417.6	MT1F	30	38	348	463
ENSG00000187193.8	MT1X	225	196	1341	1243
ENSG00000125148.6	MT2A	12107	24487	3645	3448
ENSG00000168412.6	MTNR1A	0	0	150	156
ENSG00000185499.16	MUC1	13894	20006	321	311
ENSG00000157502.13	MUM1L1	0	0	1265	1315
ENSG00000170681.6	MURC	75	52	756	712
ENSG00000196814.14	MVB12B	228	565	4978	5331
ENSG00000013364.18	MVP	9860	22381	437	527
ENSG00000157601.13	MX1	896	139144	164	249
ENSG00000162576.16	MXRA8	614	428	3677	3496
ENSG00000116990.10	MYCL	25	14	791	687
ENSG00000134323.10	MYCN	0	0	206	167
ENSG00000104177.17	MYEF2	4	12	2669	2501
ENSG00000105357.15	MYH14	2	6	4657	4800
ENSG00000144821.9	MYH15	10	2	96	128
ENSG00000109063.14	MYH3	114	162	1683	1937
ENSG00000101335.9	MYL9	29719	25640	1490	1587
ENSG00000065534.18	MYLK	578	456	3281	2987
ENSG00000091536.16	MYO15A	10	14	110	168
ENSG00000176658.16	MYO1D	28	32	8694	8610
ENSG00000095777.14	MYO3A	0	2	635	652
ENSG00000167306.19	MYO5B	200	127	1363	1373
ENSG00000196586.13	MYO6	1371	1325	9862	9240
ENSG00000137474.19	MYO7A	107	109	1091	1127
ENSG00000129152.3	MYOD1	0	0	111	130
ENSG00000138119.16	MYOF	35902	43501	2931	3095
ENSG00000142661.18	MYOM3	162	202	1001	1036
ENSG00000124920.13	MYRF	409	383	2882	2750
ENSG00000196132.11	MYT1	0	0	278	279
ENSG00000139597.17	N4BP2L1	18	22	249	231
ENSG00000077616.10	NAALAD2	176	118	2744	2656
ENSG00000186310.9	NAP1L3	6	0	98	138
ENSG00000147813.15	NAPRT	4309	4066	674	789
ENSG00000131400.7	NAPSA	10	0	166	189
ENSG00000185818.7	NAT8L	1462	904	6097	5826
ENSG00000274180.1	NATD1	368	227	2910	2993
ENSG00000142794.18	NBPF3	241	226	2706	2538
ENSG00000104490.17	NCALD	29	19	216	240
ENSG00000149294.16	NCAM1	2	2	2607	2388
ENSG00000123338.12	NCKAP1L	8	4	290	293
ENSG00000176771.15	NCKAP5	2467	2658	222	234
ENSG00000111912.19	NCOA7	7580	18660	2040	1989
ENSG00000173376.13	NDNF	163	100	872	717
ENSG00000165795.22	NDRG2	449	400	3838	3680
ENSG00000103154.9	NECAB2	10	18	469	443
ENSG00000143217.8	NECTIN4	38	32	635	603
ENSG00000277586.1	NEFL	52	26	21506	21197
ENSG00000104722.13	NEFM	6	2	162	160
ENSG00000067141.16	NEO1	281	312	14448	13579
ENSG00000214357.8	NEURL1B	3633	2719	496	480
ENSG00000163531.15	NFASC	0	2	139	119
ENSG00000131196.17	NFATC1	463	382	4814	4870
ENSG00000101096.19	NFATC2	1746	983	143	110
ENSG00000141905.17	NFIC	23199	21802	3227	3083
ENSG00000064300.8	NGFR	28	13	1478	1339
ENSG00000177551.5	NHLH2	2	0	1637	1538
ENSG00000188158.14	NHS	2040	3082	336	315
ENSG00000204131.8	NHSL2	50	16	2138	2148
ENSG00000087303.17	NID2	270	215	1522	1485
ENSG00000163293.11	NIPAL1	59	133	2593	2537
ENSG00000140807.6	NKD1	35	54	1699	1482
ENSG00000145506.13	NKD2	56	66	2510	2521
ENSG00000179846.9	NKPD1	6	0	105	96
ENSG00000229544.8	NKX1-2	0	0	1035	963
ENSG00000136352.17	NKX2-1	30	34	593	602
ENSG00000125820.5	NKX2-2	0	0	411	465
ENSG00000119919.10	NKX2-3	0	0	256	216
ENSG00000125816.4	NKX2-4	0	0	1189	1141
ENSG00000183072.9	NKX2-5	36	16	2749	2707
ENSG00000136327.6	NKX2-8	14	10	309	263
ENSG00000163623.9	NKX6-1	22	20	1239	1169
ENSG00000169760.17	NLGN1	5	2	668	596
ENSG00000140853.15	NLRC5	7681	34061	376	589
ENSG00000179873.14	NLRP11	34	8	339	285
ENSG00000103202.12	NME4	6167	5312	33293	34241
ENSG00000112981.4	NME5	0	0	115	104
ENSG00000123609.10	NMI	1738	9598	483	634
ENSG00000153406.13	NMRAL1	4845	4241	297	292
ENSG00000077009.13	NMRK2	0	0	683	626
ENSG00000101746.15	NOL4	0	0	140	160
ENSG00000103226.17	NOMO3	386	402	2925	2832
ENSG00000007171.16	NOS2	0	0	649	627
ENSG00000164867.10	NOS3	2	0	446	403
ENSG00000136999.4	NOV	2404	1870	206	201
ENSG00000104967.6	NOVA2	4	0	128	152
ENSG00000188747.8	NOXA1	152	135	893	894
ENSG00000130751.9	NPAS1	172	86	3767	3981
ENSG00000015520.14	NPC1L1	4	0	159	164
ENSG00000168743.12	NPNT	20688	19171	1809	1619
ENSG00000163273.3	NPPC	2	0	252	253
ENSG00000169418.9	NPR1	7456	6909	1189	1137
ENSG00000113389.15	NPR3	26072	33798	128	120
ENSG00000106236.3	NPTX2	0	0	742	791
ENSG00000181019.12	NQO1	64265	60369	1574	1657
ENSG00000112333.11	NR2E1	13	6	712	701
ENSG00000123358.19	NR4A1	7318	6699	1273	1330
ENSG00000153234.13	NR4A2	3670	4691	342	354
ENSG00000116833.13	NR5A2	12	16	135	130
ENSG00000148200.16	NR6A1	723	741	4030	3862
ENSG00000198435.3	NRARP	277	167	21919	20041
ENSG00000158458.19	NRG2	12	13	317	267
ENSG00000169752.16	NRG4	2113	1483	203	221
ENSG00000154146.12	NRGN	399	320	2609	2627
ENSG00000124785.8	NRN1	0	0	1163	1156
ENSG00000174004.5	NRROS	4	2	141	140
ENSG00000171119.2	NRTN	18	15	251	249
ENSG00000110076.18	NRXN2	0	2	752	696
ENSG00000168824.14	NSG1	2	4	913	880
ENSG00000122643.18	NT5C3A	4049	25107	2875	2883
ENSG00000185652.11	NTF3	2	0	486	532
ENSG00000065320.8	NTN1	11	27	4959	5261
ENSG00000101188.4	NTSR1	2	6	210	214
ENSG00000122824.10	NUDT10	0	0	1002	1039
ENSG00000196368.4	NUDT11	2	2	2690	2509
ENSG00000140876.11	NUDT7	16	8	169	191
ENSG00000184923.12	NUTM2A	16	11	93	130
ENSG00000214562.14	NUTM2D	5	13	156	140
ENSG00000182575.7	NXPH3	4	16	166	160
ENSG00000182379.9	NXPH4	294	198	2822	2663
ENSG00000166924.8	NYAP1	39	74	282	313
ENSG00000089127.12	OAS1	2317	48171	33	752
ENSG00000111335.12	OAS2	110	37817	50	1015
ENSG00000111331.12	OAS3	9312	128216	6132	17821
ENSG00000135114.12	OASL	691	23974	36	220
ENSG00000104044.15	OCA2	11	6	840	783
ENSG00000197822.10	OCLN	94	80	1771	1734
ENSG00000177989.13	ODF3B	366	2133	112	111
ENSG00000197444.9	OGDHL	68	46	2253	2215
ENSG00000130558.19	OLFM1	29981	19813	344	337
ENSG00000105088.8	OLFM2	86	76	841	766
ENSG00000183801.7	OLFML1	14	16	957	979
ENSG00000185585.19	OLFML2A	18591	16507	643	678
ENSG00000162745.10	OLFML2B	31	39	188	205
ENSG00000116774.11	OLFML3	6	7	370	326
ENSG00000205927.4	OLIG2	6	0	222	280
ENSG00000116329.10	OPRD1	2	12	1121	988
ENSG00000082556.10	OPRK1	6	0	184	136
ENSG00000123240.16	OPTN	5993	16471	1746	1953
ENSG00000184792.15	OSBP2	16868	15217	1666	1843
ENSG00000144645.13	OSBPL10	6929	7186	863	792
ENSG00000170909.13	OSCAR	7	0	137	135
ENSG00000140961.12	OSGIN1	1842	1800	99	103
ENSG00000145623.12	OSMR	22691	42308	872	980
ENSG00000143867.6	OSR1	14	30	416	365
ENSG00000115155.16	OTOF	2	43	129	135
ENSG00000169918.9	OTUD7A	56	49	271	307
ENSG00000085465.12	OVGP1	85	61	380	382
ENSG00000125850.10	OVOL2	8	14	176	195
ENSG00000177359.17	OVOS2	43	31	776	743
ENSG00000187848.12	P2RX2	2	0	110	131
ENSG00000135124.14	P2RX4	271	242	1607	1664
ENSG00000169860.6	P2RY1	314	360	2475	2256
ENSG00000149380.11	P4HA3	3527	2815	135	159
ENSG00000124507.10	PACSIN1	12	12	835	925
ENSG00000117115.12	PADI2	40	48	620	534
ENSG00000076641.4	PAG1	116	100	2130	1877
ENSG00000124374.8	PAIP2B	95	59	1934	1859
ENSG00000107719.8	PALD1	259	222	4037	4059
ENSG00000099260.10	PALMD	4844	3260	138	129
ENSG00000149090.11	PAMR1	2	2	698	670
ENSG00000182752.9	PAPPA	5169	7621	553	551
ENSG00000188582.8	PAQR9	5	3	145	122
ENSG00000124171.8	PARD6B	259	165	1391	1228
ENSG00000178184.15	PARD6G	420	354	2663	2472
ENSG00000178685.13	PARP10	2163	42289	349	1725
ENSG00000111224.13	PARP11	2	0	1738	1695
ENSG00000059378.12	PARP12	3014	26088	176	506
ENSG00000173193.13	PARP14	4405	100542	2730	5196
ENSG00000138496.16	PARP9	2215	35484	1626	4564
ENSG00000125813.13	PAX1	2	0	794	751
ENSG00000075891.21	PAX2	0	0	136	154
ENSG00000135903.18	PAX3	0	2	1421	1521
ENSG00000009709.11	PAX7	2	0	913	948
ENSG00000198807.12	PAX9	153	169	851	954
ENSG00000183570.16	PCBP3	0	0	138	146
ENSG00000138650.8	PCDH10	8	0	718	751
ENSG00000189184.11	PCDH18	2	0	956	916
ENSG00000165194.15	PCDH19	2	0	702	704
ENSG00000184226.14	PCDH9	68	46	52268	48217
ENSG00000250120.6	PCDHA10	2	6	967	835
ENSG00000249158.6	PCDHA11	15	18	209	201
ENSG00000204962.5	PCDHA8	8	10	117	107
ENSG00000248383.4	PCDHAC1	4	2	192	280
ENSG00000120328.6	PCDHB12	64	84	379	362
ENSG00000272674.3	PCDHB16	29	47	229	247
ENSG00000112852.6	PCDHB2	14	31	1481	1375
ENSG00000113211.5	PCDHB6	8	2	143	93
ENSG00000120322.3	PCDHB8	18	19	395	461
ENSG00000253873.5	PCDHGA11	14	10	1654	1471
ENSG00000276547.1	PCDHGB5	2	3	556	632
ENSG00000240184.6	PCDHGC3	370	352	4067	4321
ENSG00000242419.5	PCDHGC4	0	0	383	263
ENSG00000124253.10	PCK1	18	12	188	216
ENSG00000248485.1	PCP4L1	0	0	158	181
ENSG00000102109.8	PCSK1N	0	2	2491	2101
ENSG00000099139.13	PCSK5	2	12	2146	2072
ENSG00000169174.10	PCSK9	26918	21112	111	101
ENSG00000102230.13	PCYT1B	16	8	2897	2671
ENSG00000128655.16	PDE11A	7	19	200	266
ENSG00000123360.11	PDE1B	0	0	500	489
ENSG00000113448.17	PDE4D	21168	23332	1793	1687
ENSG00000138735.15	PDE5A	416	345	2083	1876
ENSG00000113231.13	PDE8B	5865	4443	850	774
ENSG00000160191.17	PDE9A	14	2	1280	1276
ENSG00000134853.11	PDGFRA	2	4	194	180
ENSG00000113721.13	PDGFRB	3875	3520	276	292
ENSG00000185615.15	PDIA2	38	20	1130	1258
ENSG00000067992.12	PDK3	765	805	4511	4039
ENSG00000004799.7	PDK4	24121	22010	205	180
ENSG00000131435.12	PDLIM4	2	12	1847	1897
ENSG00000162493.16	PDPN	4	4	6250	6381
ENSG00000133401.15	PDZD2	1513	17710	747	1048
ENSG00000121440.14	PDZRN3	4	0	1082	1166
ENSG00000242265.5	PEG10	46499	37841	390	336
ENSG00000177614.10	PGBD5	102	82	2890	2900
ENSG00000119630.13	PGF	18	24	1111	1062
ENSG00000154330.12	PGM5	16	15	359	367
ENSG00000082175.14	PGR	2	2	127	116
ENSG00000112137.17	PHACTR1	6	8	177	151
ENSG00000087495.16	PHACTR3	13	4	182	139
ENSG00000056487.15	PHF21B	4	0	105	106
ENSG00000173868.11	PHOSPHO1	18	16	132	148
ENSG00000139200.13	PIANP	28	4	496	466
ENSG00000154864.11	PIEZO2	15277	14120	659	603
ENSG00000173947.13	PIFO	2	6	144	172
ENSG00000155629.14	PIK3AP1	2	35	771	848
ENSG00000133056.13	PIK3C2B	8301	8434	1203	1158
ENSG00000171608.15	PIK3CD	311	249	1642	1578
ENSG00000141506.13	PIK3R5	4	5	359	314
ENSG00000087842.10	PIR	8160	7340	1196	1119
ENSG00000154217.14	PITPNC1	4911	5226	1007	1010
ENSG00000091622.15	PITPNM3	3985	2823	500	566
ENSG00000162878.12	PKDCC	10743	16181	2266	2211
ENSG00000130943.6	PKDREJ	2	0	111	93
ENSG00000165495.15	PKNOX2	2	0	306	323
ENSG00000057294.14	PKP2	499	350	6737	6984
ENSG00000116711.9	PLA2G4A	20509	20003	356	350
ENSG00000153246.12	PLA2R1	10368	9965	172	112
ENSG00000170965.9	PLAC1	38	34	535	531
ENSG00000011422.11	PLAUR	4441	7847	700	700
ENSG00000137841.11	PLCB2	125	72	1457	1455
ENSG00000197943.9	PLCG2	42	28	1554	1441
ENSG00000114805.16	PLCH1	0	2	971	998
ENSG00000169499.14	PLEKHA2	11437	11177	983	1001
ENSG00000105559.11	PLEKHA4	456	9957	738	1012
ENSG00000021300.13	PLEKHB1	129	108	3609	3841
ENSG00000153404.14	PLEKHG4B	33	49	5857	6111
ENSG00000167676.4	PLIN4	36	28	392	362
ENSG00000214456.8	PLIN5	2	9	144	138
ENSG00000152952.11	PLOD2	36283	37623	7117	6826
ENSG00000102007.10	PLP2	29937	27727	5351	5085
ENSG00000141934.9	PLPP2	6843	5810	114	118
ENSG00000203805.10	PLPP4	4	0	477	463
ENSG00000160539.4	PLPP7	0	2	429	435
ENSG00000129951.18	PLPPR3	94	84	1282	1092
ENSG00000117600.12	PLPPR4	32	101	370	350
ENSG00000114698.14	PLSCR4	1018	1991	307	291
ENSG00000161381.13	PLXDC1	11	14	111	135
ENSG00000120594.16	PLXDC2	8059	8124	813	775
ENSG00000221866.9	PLXNA4	34	39	317	306
ENSG00000198753.11	PLXNB3	1048	952	147	206
ENSG00000141682.11	PMAIP1	2018	3461	13831	14193
ENSG00000124225.15	PMEPA1	14494	7063	1306	1372
ENSG00000118557.15	PMFBP1	22	36	167	158
ENSG00000109099.13	PMP22	12969	16599	2021	1654
ENSG00000130822.15	PNCK	32	18	199	167
ENSG00000240694.8	PNMA2	4278	4515	783	716
ENSG00000235961.5	PNMA6A	38	20	408	456
ENSG00000182013.17	PNMAL1	18	6	5081	5335
ENSG00000204851.6	PNMAL2	0	0	185	176
ENSG00000141744.3	PNMT	15	12	121	120
ENSG00000130653.15	PNPLA7	133	123	1171	1121
ENSG00000128567.16	PODXL	42810	49222	6209	6147
ENSG00000130997.16	POLN	59	76	888	764
ENSG00000105854.12	PON2	18672	17061	2881	2664
ENSG00000028277.21	POU2F2	28	21	219	159
ENSG00000198914.3	POU3F3	4	4	2048	1911
ENSG00000152192.7	POU4F1	2	0	2015	2057
ENSG00000106536.19	POU6F2	0	0	491	521
ENSG00000177380.13	PPFIA3	718	576	3744	3810
ENSG00000143847.15	PPFIA4	48	64	1021	928
ENSG00000166387.11	PPFIBP2	26	14	993	989
ENSG00000118898.15	PPL	9693	9279	1036	963
ENSG00000175175.5	PPM1E	185	186	3032	2902
ENSG00000155367.15	PPM1J	38	41	600	570
ENSG00000213889.10	PPM1N	98	114	588	603
ENSG00000104881.15	PPP1R13L	5041	4869	607	685
ENSG00000198729.4	PPP1R14C	4	2	2411	2573
ENSG00000101445.9	PPP1R16B	0	4	218	260
ENSG00000135447.16	PPP1R1A	0	0	376	388
ENSG00000150722.10	PPP1R1C	50	28	265	256
ENSG00000162148.10	PPP1R32	18	18	89	119
ENSG00000119938.8	PPP1R3C	5606	3701	170	144
ENSG00000119698.11	PPP4R4	2	2	488	694
ENSG00000142611.16	PRDM16	2	0	967	1048
ENSG00000152784.15	PRDM8	16	22	278	200
ENSG00000139174.10	PRICKLE1	54	47	1058	1024
ENSG00000163637.11	PRICKLE2	22	10	614	625
ENSG00000175785.12	PRIMA1	2	0	603	587
ENSG00000106617.13	PRKAG2	427	329	2701	2826
ENSG00000005249.12	PRKAR2B	377	226	1540	1477
ENSG00000166501.12	PRKCB	1156	966	170	212
ENSG00000126583.10	PRKCG	16	34	175	158
ENSG00000065675.14	PRKCQ	12	26	442	540
ENSG00000184304.14	PRKD1	37	46	1141	1044
ENSG00000185532.15	PRKG1	50	40	679	620
ENSG00000163421.8	PROK2	2	0	155	143
ENSG00000117707.15	PROX1	2	6	128	151
ENSG00000212123.3	PRR22	149	96	620	607
ENSG00000224383.7	PRR29	26	14	107	115
ENSG00000183248.11	PRR36	24	24	370	361
ENSG00000135362.13	PRR5L	5354	4442	312	321
ENSG00000167371.17	PRRT2	1572	1698	343	306
ENSG00000224940.8	PRRT4	0	6	396	374
ENSG00000112812.15	PRSS16	82	92	907	828
ENSG00000146250.6	PRSS35	4	2	354	314
ENSG00000166450.12	PRTG	426	311	2307	2149
ENSG00000106772.17	PRUNE2	8041	9430	251	368
ENSG00000243137.7	PSG4	6	8	304	321
ENSG00000205220.11	PSMB10	378	1742	108	140
ENSG00000240065.7	PSMB9	782	6742	98	152
ENSG00000140368.12	PSTPIP1	9	22	298	300
ENSG00000185920.15	PTCH1	889	797	11407	10726
ENSG00000117425.13	PTCH2	54	59	667	739
ENSG00000165186.10	PTCHD1	0	0	166	120
ENSG00000148344.10	PTGES	6614	5423	904	951
ENSG00000160801.13	PTH1R	8	6	335	351
ENSG00000112245.9	PTP4A1	112479	103784	20498	20114
ENSG00000111679.16	PTPN6	182	221	2448	2705
ENSG00000153707.16	PTPRD	134	165	1594	1522
ENSG00000144724.19	PTPRG	92	134	4388	4182
ENSG00000080031.9	PTPRH	26	24	176	122
ENSG00000155093.17	PTPRN2	2	2	537	488
ENSG00000172733.11	PURG	0	0	453	441
ENSG00000130508.10	PXDN	74092	72656	5644	5948
ENSG00000068976.13	PYGM	16	23	237	243
ENSG00000115828.15	QPCT	4	2	2448	2168
ENSG00000186867.10	QRFPR	2	0	558	540
ENSG00000156675.15	RAB11FIP1	1581	1483	7511	8055
ENSG00000131242.16	RAB11FIP4	24	38	2821	2578
ENSG00000069974.15	RAB27A	3448	4074	606	566
ENSG00000041353.9	RAB27B	1054	2414	174	173
ENSG00000100228.12	RAB36	80	55	2279	2403
ENSG00000179331.2	RAB39A	0	0	178	166
ENSG00000155961.4	RAB39B	0	3	205	178
ENSG00000169213.6	RAB3B	352	284	2400	2511
ENSG00000123570.3	RAB9B	0	0	608	472
ENSG00000169750.8	RAC3	2448	2311	13172	13416
ENSG00000157927.16	RADIL	0	0	1560	1490
ENSG00000166349.9	RAG1	12	12	166	188
ENSG00000131831.17	RAI2	2	12	263	218
ENSG00000136237.18	RAPGEF5	6	8	1759	1646
ENSG00000108352.11	RAPGEFL1	455	452	2481	2418
ENSG00000198915.11	RASGEF1A	53	40	4168	4198
ENSG00000146090.15	RASGEF1C	7	18	361	300
ENSG00000113319.11	RASGRF2	142	109	1395	1240
ENSG00000068831.18	RASGRP2	23	19	417	423
ENSG00000105538.9	RASIP1	9187	7439	314	318
ENSG00000100276.9	RASL10A	15	8	238	308
ENSG00000122035.6	RASL11A	92	77	581	537
ENSG00000128045.6	RASL11B	19	4	753	777
ENSG00000189431.7	RASSF10	18	36	124	186
ENSG00000101265.15	RASSF2	44	34	888	910
ENSG00000107551.20	RASSF4	84	43	894	848
ENSG00000266094.7	RASSF5	225	260	1991	1830
ENSG00000167281.18	RBFOX3	6	4	366	338
ENSG00000185272.13	RBM11	20	65	300	355
ENSG00000203867.7	RBM20	110	56	3462	3387
ENSG00000112183.14	RBM24	78	46	422	395
ENSG00000132819.16	RBM38	1843	1517	9205	9441
ENSG00000144642.21	RBMS3	1946	2212	374	356
ENSG00000138207.13	RBP4	40	26	554	572
ENSG00000162444.11	RBP7	24	16	649	626
ENSG00000172348.14	RCAN2	8	24	328	319
ENSG00000167771.5	RCOR2	148	60	1995	1985
ENSG00000278023.4	RDM1	119	57	1876	1597
ENSG00000132563.15	REEP2	607	443	4492	4624
ENSG00000102032.12	RENBP	8	6	429	457
ENSG00000165731.17	RET	6	27	932	846
ENSG00000185002.9	RFX6	0	0	204	184
ENSG00000243978.8	RGAG1	8	10	441	423
ENSG00000242732.4	RGAG4	138	140	2075	1860
ENSG00000102760.12	RGCC	2453	2178	384	430
ENSG00000182175.13	RGMA	32	41	2246	2195
ENSG00000169220.17	RGS14	304	276	1665	1601
ENSG00000143333.6	RGS16	373	389	2324	2438
ENSG00000108370.16	RGS9	76	68	952	926
ENSG00000173156.6	RHOD	6165	5023	1061	1026
ENSG00000116574.5	RHOU	478	343	4549	4369
ENSG00000275793.1	RIMBP3	20	12	228	172
ENSG00000117016.9	RIMS3	64	59	1297	1249
ENSG00000101098.12	RIMS4	395	289	7441	7375
ENSG00000174791.10	RIN1	2597	2058	333	339
ENSG00000183145.8	RIPPLY3	24	14	147	140
ENSG00000107014.8	RLN2	6	4	130	162
ENSG00000172602.9	RND1	52	15	412	398
ENSG00000108830.9	RND2	70	56	2614	2762
ENSG00000133874.1	RNF122	243	553	2357	2141
ENSG00000133135.13	RNF128	6	2	1538	1312
ENSG00000151692.14	RNF144A	158	201	2672	2617
ENSG00000176641.10	RNF152	0	6	493	433
ENSG00000141622.13	RNF165	2595	2107	154	172
ENSG00000180537.12	RNF182	24304	21455	952	809
ENSG00000105982.16	RNF32	112	102	769	725
ENSG00000108375.12	RNF43	54	62	2591	2599
ENSG00000154134.14	ROBO3	40	26	2291	2406
ENSG00000169071.14	ROR2	5808	7676	728	697
ENSG00000069667.15	RORA	20	38	870	826
ENSG00000283201.1	RP11-15H20.8	9	10	152	158
ENSG00000272899.3	RP11-309L24.4	59	50	299	281
ENSG00000281106.2	RP11-327P2.7	2	0	129	130
ENSG00000187695.7	RP11-723O4.6	9	8	114	134
ENSG00000088899.14	RP5-1187M17.10	266	176	2683	2654
ENSG00000274386.5	RP5-994D16.11	25	14	219	214
ENSG00000140986.7	RPL3L	18	9	256	247
ENSG00000178718.6	RPP25	7242	6177	908	869
ENSG00000177519.3	RPRM	101	151	1082	1265
ENSG00000072133.10	RPS6KA6	0	2	999	1102
ENSG00000198208.11	RPS6KL1	65	64	1364	1487
ENSG00000025039.14	RRAGD	78	58	1979	2171
ENSG00000139970.16	RTN1	98	126	668	720
ENSG00000185924.6	RTN4RL1	0	2	2183	2081
ENSG00000186907.7	RTN4RL2	98	86	479	589
ENSG00000108309.12	RUNDC3A	19	13	148	156
ENSG00000079102.16	RUNX1T1	1	4	812	749
ENSG00000143171.12	RXRG	0	6	141	172
ENSG00000196218.12	RYR1	30	16	163	112
ENSG00000198626.15	RYR2	69	33	2042	1786
ENSG00000188643.10	S100A16	17931	18241	1184	1242
ENSG00000196754.10	S100A2	3043	2432	163	195
ENSG00000188015.9	S100A3	2466	2588	141	108
ENSG00000196154.11	S100A4	40732	36810	1059	1098
ENSG00000197956.9	S100A6	78984	72831	144	145
ENSG00000213694.3	S1PR3	5053	6888	697	720
ENSG00000103449.11	SALL1	6	4	1984	1925
ENSG00000165821.11	SALL2	366	297	7728	7946
ENSG00000256463.8	SALL3	8	8	5281	5292
ENSG00000167100.14	SAMD14	99	63	502	552
ENSG00000205413.7	SAMD9	4634	81966	722	2607
ENSG00000177409.11	SAMD9L	678	49244	40	193
ENSG00000123453.17	SARDH	8	7	1446	1424
ENSG00000130066.16	SAT1	3859	5910	72321	72644
ENSG00000168077.13	SCARA3	58135	56086	4513	4861
ENSG00000244486.8	SCARF2	247	200	4925	4817
ENSG00000006747.14	SCIN	126	278	1878	1668
ENSG00000166257.8	SCN3B	14	18	184	212
ENSG00000007314.11	SCN4A	6	0	176	179
ENSG00000177098.8	SCN4B	0	0	269	242
ENSG00000183873.15	SCN5A	15	13	1094	1086
ENSG00000196876.14	SCN8A	2	4	863	783
ENSG00000175356.12	SCUBE2	13	30	140	181
ENSG00000146197.8	SCUBE3	132	156	742	702
ENSG00000069188.16	SDK2	9	27	3342	3072
ENSG00000141574.7	SECTM1	1746	21198	114	144
ENSG00000075213.10	SEMA3A	1903	2345	277	268
ENSG00000012171.18	SEMA3B	15802	15568	897	868
ENSG00000075223.13	SEMA3C	15810	11168	1460	1409
ENSG00000170381.12	SEMA3E	2	4	492	414
ENSG00000001617.11	SEMA3F	10014	12621	1411	1441
ENSG00000196189.12	SEMA4A	16	30	242	237
ENSG00000082684.14	SEMA5B	0	0	149	140
ENSG00000092421.16	SEMA6A	61	98	4347	4132
ENSG00000167680.15	SEMA6B	164	124	1067	899
ENSG00000143434.15	SEMA6C	264	161	2193	2307
ENSG00000138623.9	SEMA7A	98	50	555	543
ENSG00000250722.5	SEPP1	117	56	2129	1978
ENSG00000100167.19	SEPT3	199	200	1602	1435
ENSG00000188488.13	SERPINA5	2	10	356	365
ENSG00000166401.14	SERPINB8	1449	1414	192	221
ENSG00000106366.8	SERPINE1	3104	4884	109	126
ENSG00000132386.10	SERPINF1	244	152	2694	2563
ENSG00000163536.12	SERPINI1	1759	1810	260	211
ENSG00000082497.11	SERTAD4	14	34	1581	1484
ENSG00000080546.13	SESN1	856	689	4576	4754
ENSG00000175793.11	SFN	16913	18781	2978	2990
ENSG00000104332.11	SFRP1	92	63	4737	4391
ENSG00000118515.11	SGK1	30645	29479	1608	1552
ENSG00000104205.12	SGK3	145	150	836	882
ENSG00000167037.18	SGSM1	12	12	532	555
ENSG00000100092.20	SH3BP1	294	399	1893	1761
ENSG00000131370.15	SH3BP5	5272	4529	720	672
ENSG00000140600.16	SH3GL3	16	8	1888	1897
ENSG00000172985.10	SH3RF3	56	52	1621	1529
ENSG00000161681.15	SHANK1	0	0	556	523
ENSG00000162105.17	SHANK2	2	1	620	584
ENSG00000129946.10	SHC2	21	13	1201	1179
ENSG00000138606.19	SHF	110	141	717	605
ENSG00000164690.7	SHH	0	0	246	260
ENSG00000180730.4	SHISA2	11	4	5514	4698
ENSG00000178343.4	SHISA3	12	10	178	143
ENSG00000234965.2	SHISA8	4	4	542	438
ENSG00000146950.12	SHROOM2	28	30	1267	1249
ENSG00000142178.7	SIK1	2629	2964	164	131
ENSG00000112246.9	SIM1	0	2	755	836
ENSG00000089163.4	SIRT4	30	18	175	162
ENSG00000138083.4	SIX3	2	0	1719	1706
ENSG00000145248.6	SLC10A4	75	67	494	383
ENSG00000124140.13	SLC12A5	21	20	153	169
ENSG00000158296.13	SLC13A3	8	8	189	181
ENSG00000164707.15	SLC13A4	249	214	5548	5264
ENSG00000110446.10	SLC15A3	31	4833	41	200
ENSG00000112394.16	SLC16A10	190	125	3524	3238
ENSG00000147100.10	SLC16A2	52	43	5260	5039
ENSG00000141526.15	SLC16A3	38620	40270	961	998
ENSG00000104888.9	SLC17A7	12	8	417	354
ENSG00000135917.13	SLC19A3	30	28	912	852
ENSG00000079215.13	SLC1A3	414	1562	6543	5936
ENSG00000092096.15	SLC22A17	1	4	234	272
ENSG00000146477.5	SLC22A3	10097	8780	104	144
ENSG00000259803.6	SLC22A31	6	0	449	463
ENSG00000197208.5	SLC22A4	1024	1218	173	178
ENSG00000074621.13	SLC24A1	558	438	3279	3257
ENSG00000140090.17	SLC24A4	4	2	621	582
ENSG00000197119.12	SLC25A29	7844	5893	1181	1222
ENSG00000145832.12	SLC25A48	2	0	487	488
ENSG00000135502.17	SLC26A10	10	10	906	923
ENSG00000113396.12	SLC27A6	24	16	1812	1619
ENSG00000164638.10	SLC29A4	64	76	1638	1569
ENSG00000197496.5	SLC2A10	4	8	793	764
ENSG00000151229.12	SLC2A13	6875	6929	781	805
ENSG00000173262.11	SLC2A14	5	4	2020	1730
ENSG00000059804.15	SLC2A3	1096	929	63985	58770
ENSG00000181856.14	SLC2A4	70	26	381	473
ENSG00000196660.10	SLC30A10	4	0	238	178
ENSG00000158014.14	SLC30A2	0	0	194	149
ENSG00000196376.10	SLC35F1	64	70	945	979
ENSG00000139209.15	SLC38A4	10	0	200	180
ENSG00000147804.9	SLC39A4	349	278	2755	3010
ENSG00000138449.10	SLC40A1	196	130	1534	1398
ENSG00000149150.8	SLC43A1	103	87	2195	2048
ENSG00000139508.14	SLC46A3	22	22	670	668
ENSG00000114923.16	SLC4A3	84	77	1413	1576
ENSG00000050438.16	SLC4A8	26	10	734	607
ENSG00000101276.14	SLC52A3	28	78	331	371
ENSG00000148942.14	SLC5A12	0	0	123	103
ENSG00000132164.9	SLC6A11	8	5	2387	2195
ENSG00000111181.12	SLC6A12	2	6	261	249
ENSG00000010379.15	SLC6A13	2	2	179	175
ENSG00000063127.15	SLC6A16	23	24	557	547
ENSG00000197106.6	SLC6A17	12	4	158	204
ENSG00000142319.17	SLC6A3	2	0	107	118
ENSG00000131389.16	SLC6A6	31383	35572	4436	4083
ENSG00000196517.11	SLC6A9	5714	7671	746	679
ENSG00000151012.13	SLC7A11	23117	20907	1318	1244
ENSG00000155465.18	SLC7A7	20	34	278	178
ENSG00000092068.19	SLC7A8	34	22	3182	3122
ENSG00000183023.18	SLC8A1	4	2	1591	1441
ENSG00000174640.12	SLCO2A1	6414	5428	529	555
ENSG00000176463.13	SLCO3A1	9277	10721	282	377
ENSG00000173930.8	SLCO4C1	0	2	522	453
ENSG00000137571.10	SLCO5A1	2	16	1273	1101
ENSG00000172716.16	SLFN11	372	490	17900	17835
ENSG00000166750.9	SLFN5	4582	50189	955	1524
ENSG00000187122.16	SLIT1	8	12	422	352
ENSG00000145147.19	SLIT2	568	499	23041	21650
ENSG00000184347.14	SLIT3	8	8	857	800
ENSG00000235169.7	SMIM1	33	10	210	242
ENSG00000178947.8	SMIM10L2A	2	0	846	741
ENSG00000196972.8	SMIM10L2B	8	8	969	954
ENSG00000128602.9	SMO	113	72	8306	8211
ENSG00000198732.10	SMOC1	66913	61910	1466	1413
ENSG00000112562.18	SMOC2	0	0	188	208
ENSG00000130768.14	SMPDL3B	93	74	715	665
ENSG00000091482.5	SMPX	8	10	111	132
ENSG00000188176.11	SMTNL2	0	0	386	355
ENSG00000065609.14	SNAP91	8	2	152	123
ENSG00000074317.10	SNCB	0	0	158	166
ENSG00000086300.15	SNX10	64	83	1398	1271
ENSG00000157734.13	SNX22	278	245	1407	1235
ENSG00000148158.16	SNX30	1130	972	7981	7916
ENSG00000112320.11	SOBP	223	267	1728	1713
ENSG00000109610.5	SOD3	1	4	460	417
ENSG00000095637.21	SORBS1	48	176	1416	1365
ENSG00000154556.17	SORBS2	2730	1905	180	149
ENSG00000167941.2	SOST	2	0	124	140
ENSG00000171243.7	SOSTDC1	0	0	120	108
ENSG00000198944.5	SOWAHA	2	10	461	454
ENSG00000186212.3	SOWAHB	4	0	134	118
ENSG00000176887.6	SOX11	4	0	4389	4339
ENSG00000181449.3	SOX2	4	6	1626	1538
ENSG00000134595.8	SOX3	0	0	354	343
ENSG00000134532.15	SOX5	0	0	292	232
ENSG00000110693.16	SOX6	34	55	1438	1394
ENSG00000005513.9	SOX8	2	0	1337	1446
ENSG00000067066.16	SP100	3343	24022	1217	1901
ENSG00000135899.16	SP110	114	2589	74	238
ENSG00000185404.16	SP140L	1968	8177	307	343
ENSG00000204335.3	SP5	34	32	216	230
ENSG00000189120.4	SP6	92	190	970	855
ENSG00000164651.16	SP8	68	52	524	472
ENSG00000217236.1	SP9	6	4	242	235
ENSG00000155761.13	SPAG17	17	9	337	306
ENSG00000113140.10	SPARC	141	104	19172	18438
ENSG00000163071.10	SPATA18	3	12	1197	1174
ENSG00000065526.10	SPEN	12192	11931	76826	73093
ENSG00000176170.13	SPHK1	13758	14871	1824	2041
ENSG00000183018.8	SPNS2	165	132	807	768
ENSG00000134668.12	SPOCD1	1753	1430	139	116
ENSG00000152377.13	SPOCK1	15699	14002	395	378
ENSG00000262655.3	SPON1	39	58	7259	7048
ENSG00000164056.10	SPRY1	18	14	1235	1078
ENSG00000175093.4	SPSB4	10	2	2479	2365
ENSG00000070182.18	SPTB	98	97	2426	2678
ENSG00000160460.15	SPTBN4	22	12	643	611
ENSG00000134548.9	SPX	33	12	272	351
ENSG00000161011.19	SQSTM1	65314	56638	10250	10592
ENSG00000277363.4	SRCIN1	223	190	1542	1377
ENSG00000145545.11	SRD5A1	9511	8822	1621	1731
ENSG00000072310.16	SREBF1	32023	26664	2704	2468
ENSG00000185739.13	SRL	14	11	88	115
ENSG00000184343.10	SRPK3	100	76	451	502
ENSG00000154548.8	SRSF12	34	30	1960	2096
ENSG00000179954.15	SSC5D	3083	3045	167	126
ENSG00000138434.16	SSFA2	35805	32225	6769	6604
ENSG00000197558.11	SSPO	16	8	367	397
ENSG00000162009.8	SSTR5	3	0	170	179
ENSG00000149418.10	ST14	2	10	207	239
ENSG00000115525.16	ST3GAL5	171	118	1760	1801
ENSG00000073849.14	ST6GAL1	242	327	3329	3244
ENSG00000184005.10	ST6GALNAC3	0	0	1341	1129
ENSG00000140557.11	ST8SIA2	0	6	322	261
ENSG00000101638.13	ST8SIA5	8	2	122	126
ENSG00000010327.10	STAB1	12	11	629	665
ENSG00000141750.6	STAC2	16571	14161	330	340
ENSG00000185482.7	STAC3	34	23	323	336
ENSG00000138134.11	STAMBPL1	3411	2546	557	565
ENSG00000178078.11	STAP2	38	124	795	863
ENSG00000115415.18	STAT1	14272	170510	7616	22014
ENSG00000170581.13	STAT2	4690	59270	4994	7576
ENSG00000126561.16	STAT5A	2318	2786	240	310
ENSG00000159167.11	STC1	6	0	166	146
ENSG00000105889.14	STEAP1B	10	1	670	705
ENSG00000157214.13	STEAP2	164	223	1017	947
ENSG00000118046.14	STK11	446	415	7928	7872
ENSG00000148175.12	STOM	33055	55770	6273	6257
ENSG00000165730.14	STOX1	112	68	938	862
ENSG00000197768.10	STPG3	23	15	233	188
ENSG00000203685.9	STUM	0	0	691	545
ENSG00000254995.4	STX16-NPEPL1	25	44	260	251
ENSG00000168952.15	STXBP6	66	63	427	499
ENSG00000175600.15	SUGCT	63	60	506	590
ENSG00000198203.9	SULT1C2	4	2	169	198
ENSG00000198075.9	SULT1C4	0	0	518	509
ENSG00000157303.10	SUSD3	10	24	400	425
ENSG00000165124.17	SVEP1	525	494	3036	2855
ENSG00000153157.12	SYCP2L	2	2	644	607
ENSG00000165025.14	SYK	6	6	3894	3975
ENSG00000157152.16	SYN2	52	42	659	766
ENSG00000185666.14	SYN3	5	4	118	93
ENSG00000162520.14	SYNC	1255	1331	113	122
ENSG00000101463.5	SYNDIG1	0	0	928	907
ENSG00000100321.14	SYNGR1	307	268	2638	2680
ENSG00000105467.8	SYNGR4	4	8	119	112
ENSG00000171992.12	SYNPO	9379	7424	903	973
ENSG00000067715.13	SYT1	35	46	468	461
ENSG00000173227.13	SYT12	25942	19219	503	522
ENSG00000204176.13	SYT15	24	23	241	249
ENSG00000139973.16	SYT16	2	0	286	212
ENSG00000103528.16	SYT17	633	711	94	123
ENSG00000213023.10	SYT3	2	0	1410	1428
ENSG00000170743.16	SYT9	0	0	440	427
ENSG00000142765.17	SYTL1	51	62	1147	1092
ENSG00000137501.17	SYTL2	72	54	539	592
ENSG00000164458.9	T	2403	2227	196	224
ENSG00000166863.11	TAC3	2	0	199	170
ENSG00000176358.15	TAC4	1	0	109	97
ENSG00000149591.16	TAGLN	14385	12465	523	620
ENSG00000162367.11	TAL1	4	0	279	238
ENSG00000168394.10	TAP1	6614	52567	2558	3525
ENSG00000231925.11	TAPBP	21861	38469	4128	5088
ENSG00000139192.11	TAPBPL	652	1548	152	155
ENSG00000095383.19	TBC1D2	6555	6001	274	327
ENSG00000146350.13	TBC1D32	204	203	1684	1720
ENSG00000184058.12	TBX1	206	258	4896	4736
ENSG00000112837.16	TBX18	8	10	2539	2453
ENSG00000121068.13	TBX2	68	38	4523	4640
ENSG00000006638.11	TBXA2R	3190	2786	366	360
ENSG00000182916.7	TCEAL7	0	2	625	545
ENSG00000125878.6	TCF15	0	0	181	172
ENSG00000261787.1	TCF24	2	2	381	318
ENSG00000196628.14	TCF4	12	6	1780	1778
ENSG00000152284.4	TCF7L1	62	70	2191	2210
ENSG00000159450.12	TCHH	2	2	134	144
ENSG00000173809.16	TDRD12	4	2	278	183
ENSG00000162782.15	TDRD5	4	0	177	221
ENSG00000180190.11	TDRP	4	0	871	850
ENSG00000109927.9	TECTA	4	2	117	87
ENSG00000218336.8	TENM3	1801	1507	9913	9397
ENSG00000149256.15	TENM4	4	0	329	364
ENSG00000164362.18	TERT	298	230	1858	1983
ENSG00000138336.8	TET1	8	4	2719	2565
ENSG00000121101.15	TEX14	49	16	915	752
ENSG00000133863.6	TEX15	8	2	2649	2513
ENSG00000182459.4	TEX19	33	46	334	369
ENSG00000172073.3	TEX37	0	1	119	136
ENSG00000087510.6	TFAP2C	78	110	2884	3007
ENSG00000115112.7	TFCP2L1	8	4	2148	2061
ENSG00000112561.17	TFEB	1780	1700	310	307
ENSG00000003436.14	TFPI	17393	15941	434	433
ENSG00000105825.11	TFPI2	3670	3914	536	629
ENSG00000140682.18	TGFB1I1	6926	6373	594	621
ENSG00000120708.16	TGFBI	141360	125810	285	250
ENSG00000198959.11	TGM2	10871	29113	1538	1640
ENSG00000137801.10	THBS1	19781	15509	1405	1464
ENSG00000186340.14	THBS2	12	16	1773	1843
ENSG00000113296.14	THBS4	4	14	165	160
ENSG00000130775.15	THEMIS2	77	8304	722	747
ENSG00000090534.17	THPO	4	12	369	300
ENSG00000136114.15	THSD1	16	28	603	518
ENSG00000156299.13	TIAM1	96	74	3327	3253
ENSG00000146426.17	TIAM2	309	233	1546	1398
ENSG00000140993.10	TIGD7	25	26	532	436
ENSG00000223573.6	TINCR	14	12	216	260
ENSG00000163931.15	TKT	191286	178093	30853	32044
ENSG00000007350.16	TKTL1	0	0	185	146
ENSG00000196781.14	TLE1	1285	1172	6317	6349
ENSG00000095587.8	TLL2	4	4	457	369
ENSG00000164342.12	TLR3	446	6749	96	201
ENSG00000107807.12	TLX1	2	0	2825	2998
ENSG00000149809.14	TM7SF2	361	326	3490	3410
ENSG00000167608.11	TMC4	55	48	368	480
ENSG00000167895.14	TMC8	12	14	119	86
ENSG00000057704.11	TMCC3	139	143	870	877
ENSG00000241697.4	TMEFF1	6	8	205	197
ENSG00000144868.13	TMEM108	0	0	644	570
ENSG00000184986.10	TMEM121	106	58	453	421
ENSG00000139364.10	TMEM132B	4	6	113	88
ENSG00000181291.6	TMEM132E	2	2	319	374
ENSG00000244187.7	TMEM141	1067	837	5288	4765
ENSG00000249242.7	TMEM150C	21	30	350	391
ENSG00000164112.12	TMEM155	0	0	136	135
ENSG00000152128.13	TMEM163	11	2	518	465
ENSG00000205269.5	TMEM170B	447	204	2225	2078
ENSG00000157111.12	TMEM171	8	33	522	523
ENSG00000152154.10	TMEM178A	2	4	122	130
ENSG00000261115.5	TMEM178B	0	0	469	437
ENSG00000258986.6	TMEM179	0	0	79	127
ENSG00000164855.15	TMEM184A	3764	2923	600	624
ENSG00000206432.4	TMEM200C	3	0	425	442
ENSG00000187824.8	TMEM220	23	46	194	200
ENSG00000125355.15	TMEM255A	8	4	254	310
ENSG00000169758.12	TMEM266	59	53	332	385
ENSG00000126950.7	TMEM35A	0	0	402	318
ENSG00000178821.12	TMEM52	48	34	766	870
ENSG00000125895.5	TMEM74B	7	18	836	767
ENSG00000151117.8	TMEM86A	18	32	688	671
ENSG00000137103.16	TMEM8B	390	395	2629	2545
ENSG00000006042.11	TMEM98	8	4	6604	6434
ENSG00000138594.13	TMOD3	22508	22000	4110	4038
ENSG00000184012.11	TMPRSS2	0	4	221	216
ENSG00000158164.6	TMSB15A	99	62	607	614
ENSG00000158427.14	TMSB15B	0	0	75	129
ENSG00000205542.10	TMSB4X	55738	55381	4651	4661
ENSG00000185215.8	TNFAIP2	35719	35558	2691	2710
ENSG00000118503.14	TNFAIP3	7105	8416	636	584
ENSG00000049249.8	TNFRSF9	26	34	284	266
ENSG00000129991.12	TNNI3	6	0	174	149
ENSG00000105048.16	TNNT1	605	626	4143	4231
ENSG00000130595.16	TNNT3	0	0	179	246
ENSG00000078687.17	TNRC6C	374	252	3404	3480
ENSG00000198113.2	TOR4A	6190	5981	696	714
ENSG00000103460.16	TOX3	0	0	127	138
ENSG00000175274.18	TP53I11	491	586	7441	7221
ENSG00000129167.9	TPH1	4	17	149	119
ENSG00000196511.13	TPK1	174	221	1294	1282
ENSG00000198467.13	TPM2	70884	62467	1753	1812
ENSG00000167460.14	TPM4	117447	112009	14892	15304
ENSG00000159713.10	TPPP3	58	46	425	395
ENSG00000188001.9	TPRG1	27	14	174	149
ENSG00000116176.6	TPSG1	0	0	143	122
ENSG00000269113.3	TRABD2B	4696	4666	229	241
ENSG00000168016.13	TRANK1	1830	38580	296	472
ENSG00000007255.10	TRAPPC6A	104	107	491	589
ENSG00000071575.11	TRIB2	345	504	2341	2389
ENSG00000221926.11	TRIM16	13089	10628	764	727
ENSG00000108448.20	TRIM16L	32681	26524	995	1041
ENSG00000132109.9	TRIM21	1459	21542	1503	2729
ENSG00000132274.15	TRIM22	237	21360	147	866
ENSG00000163462.17	TRIM46	816	783	105	97
ENSG00000169871.12	TRIM56	11708	39285	2062	2547
ENSG00000162722.8	TRIM58	0	0	293	313
ENSG00000119283.15	TRIM67	2	2	153	125
ENSG00000185880.12	TRIM69	1592	11416	671	1082
ENSG00000146054.17	TRIM7	3643	3085	124	111
ENSG00000206557.5	TRIM71	0	2	2381	2252
ENSG00000100505.13	TRIM9	62	22	1399	1282
ENSG00000179046.8	TRIML2	16	10	356	253
ENSG00000067445.20	TRO	5	1	8526	8207
ENSG00000137672.12	TRPC6	36	24	179	180
ENSG00000187688.14	TRPV2	4	2	199	235
ENSG00000167723.14	TRPV3	11	8	634	623
ENSG00000111199.10	TRPV4	12	8	580	672
ENSG00000165125.18	TRPV6	0	0	226	201
ENSG00000102804.14	TSC22D1	27249	34227	4557	4531
ENSG00000135951.14	TSGA10	172	73	662	672
ENSG00000182463.15	TSHZ2	7326	8066	185	182
ENSG00000121297.6	TSHZ3	2	4	515	508
ENSG00000126467.10	TSKS	2	5	124	124
ENSG00000171045.14	TSNARE1	152	103	1310	1329
ENSG00000110900.14	TSPAN11	56	85	1394	1388
ENSG00000158457.5	TSPAN33	282	350	2471	2400
ENSG00000156298.12	TSPAN7	2	0	1234	1153
ENSG00000085831.15	TTC39A	136	122	3017	3041
ENSG00000168234.12	TTC39C	6410	6499	778	767
ENSG00000133985.2	TTC9	86	70	639	628
ENSG00000141540.10	TTYH2	224	223	1408	1344
ENSG00000127824.13	TUBA4A	39352	28132	358	335
ENSG00000137285.9	TUBB2B	86	84	4089	4290
ENSG00000104833.11	TUBB4A	178	137	1862	1838
ENSG00000164440.14	TXLNB	5	10	106	100
ENSG00000025708.13	TYMP	1764	8156	175	252
ENSG00000182179.11	UBA7	466	20410	96	142
ENSG00000156587.15	UBE2L6	238	14064	433	800
ENSG00000215218.3	UBE2QL1	28	20	2003	2044
ENSG00000154277.12	UCHL1	604	466	38852	37796
ENSG00000168671.9	UGT3A2	0	50	1125	996
ENSG00000111981.4	ULBP1	140	74	1294	1119
ENSG00000092929.11	UNC13D	18195	16856	465	543
ENSG00000107731.12	UNC5B	55	59	12729	11957
ENSG00000182168.14	UNC5C	154	242	1209	1155
ENSG00000124602.9	UNC5CL	2	2	182	238
ENSG00000164853.8	UNCX	0	0	249	163
ENSG00000114638.7	UPK1B	7	2	497	473
ENSG00000182040.8	USH1G	4	0	199	160
ENSG00000273820.1	USP27X	234	241	1386	1398
ENSG00000136014.11	USP44	6	4	204	198
ENSG00000181408.3	UTS2R	0	2	142	148
ENSG00000162738.5	VANGL2	4	2	5457	5310
ENSG00000071246.10	VASH1	291	199	1744	1713
ENSG00000168140.4	VASN	10652	8345	1098	1109
ENSG00000141968.7	VAV1	4	2	330	329
ENSG00000134215.15	VAV3	2735	2130	402	453
ENSG00000148704.12	VAX1	0	0	497	482
ENSG00000116035.2	VAX2	11	13	620	593
ENSG00000038427.15	VCAN	41	127	3807	3593
ENSG00000170162.13	VGLL2	0	0	465	372
ENSG00000206538.8	VGLL3	1390	943	95597	91743
ENSG00000136059.14	VILL	8	20	414	437
ENSG00000106018.13	VIPR2	830	786	109	93
ENSG00000176428.5	VPS37D	10	10	119	110
[truncated: 145 more rows]
